# Supplementary material for: The patient, diagnostic, and treatment intervals in adult patients with cancer from high- and lower-income countries: A systematic review and meta-analysis
Source: PLoS Med. 2022 Oct 20;19(10):e1004110. doi: 10.1371/journal.pmed.1004110 (PMC9584443; doi:10.1371/journal.pmed.1004110)
Supplement: S5 Table — (XLSX) [file pmed.1004110.s005.xlsx]

## Sheet: Sheet1
Covidence #	Study ID	Title	Year of publication	Are the beginning and end points of each interval clearly defined?	For all time points and intervals described, are there precise, transparent and repeatable definitions?	Is the healthcare context in which the study is based fully described?	Do the questions on time points and/or intervals clearly derive from stated definitions?	Do researchers acknowledge the need for theoretical validation and/or make reference to the theoretical framework(s) underpinning measurement and analysis of the time points?	Is there a discussion of the different biases influencing measurement of this time point?	Do the researchers discuss the complexity of the date of first presentation?	Do the researchers use an existing hierarchical rationale for the date of diagnosis measurement?	Has a validated instrument been used?	Is there some discussion of how reliability and validity (trustworthiness) has been established?	Is there discussion of the different biases influencing measurement of the time points, such as how and when the question is asked and who is being asked?	Is the timing of the interview in relation to the date of diagnosis provided?	Is there any triangulation of self-reported data with other data sources such as case notes?	Is there a clear and precise description of how case-note/medical record data were used to ascertain time points, and/or with an acknowledgment of limitations of such data?	Is there a thorough description of the database chosen including sampling coverage and completeness of information?	Total score	Risk of bias
1851	Rangel-Mendez 2018	Healthcare delay in breast cancer patients: a case study in a low-density population region from Mexico	2018	Yes	No	Yes	Uncertain	Yes	No	No	NA	NA	NA	NA	NA	NA	No	NA	0.375	Medium
1868	Abu-Helalah 2016	Delay in Presentation, Diagnosis, and Treatment for Breast Cancer Patients in Jordan.	2015	Yes	No	Yes	Uncertain	No	No	No	No	No	No	No	No	No	No	NA	0.142857	High
1872	Adams 2017	Cancer Treatment Delays in American Indians and Alaska Natives Enrolled in Medicare	2017	Yes	Yes	Yes	Yes	No	NA	NA	Yes	NA	NA	NA	NA	NA	NA	Yes	0.857143	Low
1882	Agodirin 2019	Impact of Primary Care Delay on Progression of Breast Cancer in a Black African Population: A Multicentered Survey	2019	Yes	Yes	Yes	Yes	Yes	Yes	No	NA	No	Yes	Yes	Yes	No	NA	NA	0.75	Low
1887	Ahmad 2019	Socioeconomic disparities in timeliness of care and outcomes for anal cancer patients	2019	Yes	Yes	Yes	Yes	No	NA	NA	Yes	NA	NA	NA	NA	NA	Yes	NA	0.857143	Low
1893	Akhtar 2018	Use of Alternative Medicine Is Delaying Health-Seeking Behavior by Bangladeshi Breast Cancer Patients	2018	Yes	No	Yes	Uncertain	No	No	No	NA	No	Yes	No	No	No	NA	NA	0.25	Medium
1902	Alam 2011	Delayed treatment and continued growth of nonmelanoma skin cancer.	2010	Yes	Yes	Yes	Yes	No	Yes	Yes	NA	No	No	No	No	No	NA	NA	0.5	Medium
1904	Alanen 2019	Association of diagnostic delays to survival in lung cancer: single center experience.	2019	Yes	Yes	Yes	Yes	No	NA	NA	Yes	NA	NA	NA	NA	NA	Yes	NA	0.857143	Low
1913	Allgar 2019	Time intervals from first symptom to diagnosis for head and neck cancers: An analysis of linked patient reports and medical records from the UK.	2019	Yes	Yes	Yes	Yes	Yes	Yes	Yes	Yes	No	No	Yes	Yes	Yes	Yes	NA	0.857143	Low
1914	Almassi 2018	Identifying Institutional Causes of Delay to Radical Cystectomy among Patients with High Risk Bladder Cancer Treated at a Tertiary Referral Center Using Process Map Analysis	2017	Yes	Yes	Yes	Yes	No	NA	NA	Yes	NA	NA	NA	NA	NA	Yes	NA	0.857143	Low
1916	Alwan 2019	Assessing the Period between Diagnosis of Breast Cancer and Surgical Treatment among Mastectomized Female Patients in Iraq	2019	Yes	No	No	Yes	No	NA	NA	No	NA	NA	NA	NA	NA	No	NA	0.285714	Medium
1923	Amri 2014	Treatment delay in surgically-treated colon cancer: does it affect outcomes?.	2014	Yes	Yes	Yes	Yes	No	NA	NA	No	NA	NA	NA	NA	NA	No	No	0.5	Medium
1937	Antel 2019	The determinants and impact of diagnostic delay in lymphoma in a TB and HIV endemic setting.	2019	Yes	No	Yes	Uncertain	No	Yes	No	No	No	No	No	No	No	No	NA	0.214286	High
1946	Arhi 2019	Colorectal cancer patients under the age of 50 experience delays in primary care leading to emergency diagnoses: a population-based study	2019	Yes	Yes	Yes	Yes	No	NA	Yes	No	NA	NA	NA	NA	NA	NA	Yes	0.75	Low
1955	Ashing-Giwa 2010	Diagnostic and Therapeutic Delays Among a Multiethnic Sample of Breast and Cervical Cancer Survivors	2010	Yes	Yes	Yes	Yes	Yes	NA	NA	No	No	Yes	Yes	Yes	No	NA	NA	0.727273	Medium
1957	Aslam 2017	The ``two-week wait{''} referral pathway is not associated with improved survival for patients with colorectal cancer	2017	No	No	Yes	Uncertain	No	NA	NA	No	NA	NA	NA	NA	NA	No	NA	0.142857	High
1960	Attalla 2018	Demographic and socioeconomic predictors of treatment delays, pathologic stage, and survival among patients with penile cancer: A report from the National Cancer Database	2018	Yes	No	Yes	Yes	No	NA	NA	No	NA	NA	NA	NA	NA	NA	No	0.428571	Medium
1967	Ayrault-Piault 2016	Are disparities of waiting times for breast cancer care related to socio-economic factors? A regional population-based study (France).	2016	Yes	No	No	Uncertain	No	NA	NA	No	NA	NA	NA	NA	NA	Yes	NA	0.285714	Medium
1971	Baade 2012	Factors associated with diagnostic and treatment intervals for prostate cancer in Queensland, Australia: a large cohort study.	2012	Yes	Yes	Yes	Uncertain	No	NA	No	No	No	No	Yes	Yes	No	NA	NA	0.416667	Medium
1974	Bae 2019	Demographics, Risk Factors, and Incidence of Melanoma in Patients in the New England VA Healthcare system.	2018	No	No	Yes	Uncertain	No	NA	NA	No	NA	NA	NA	NA	NA	NA	No	0.142857	High
1984	Balasubramanian 2012	BLACK MEDICAID BENEFICIARIES EXPERIENCE BREAST CANCER TREATMENT DELAYS MORE FREQUENTLY THAN WHITES	2012	Yes	Yes	Yes	Uncertain	No	NA	NA	No	NA	NA	NA	NA	NA	Yes	Yes	0.625	Medium
1994	Bleicher 2009	Association of routine pretreatment magnetic resonance imaging with time to surgery, mastectomy rate, and margin status.	2009	Yes	No	Yes	Uncertain	No	NA	NA	No	NA	NA	NA	NA	NA	No	NA	0.285714	Medium
2010	Bonfill 2015	Clinical intervals and diagnostic characteristics in a cohort of prostate cancer patients in Spain: a multicentre observational study	2015	Yes	Yes	Yes	Uncertain	No	No	No	No	No	No	No	No	Uncertain	No	NA	0.214286	High
2012	Boriani 2014	Acral Lentiginous Melanoma - misdiagnosis, referral delay and 5 years specific survival according to site.	2014	No	No	No	Uncertain	No	No	No	No	NA	NA	NA	NA	NA	No	NA	0	High
2040	Brenkman 2017	Association Between Waiting Time from Diagnosis to Treatment and Survival in Patients with Curable Gastric Cancer: A Population-Based Study in the Netherlands	2017	Yes	Yes	Yes	Yes	No	NA	NA	Yes	NA	NA	NA	NA	NA	NA	Yes	0.857143	Low
2047	Brocken 2012	Timeliness of lung cancer diagnosis and treatment in a rapid outpatient diagnostic program with combined 18FDG-PET and contrast enhanced CT scanning.	2012	Yes	No	Yes	Uncertain	No	Yes	No	No	NA	NA	NA	NA	NA	Yes	NA	0.444444	Medium
2053	Brooks 2016	Impact of time from diagnosis to initiation of curative-intent chemotherapy on clinical outcomes in patients with classical Hodgkin lymphoma	2015	Yes	Yes	Yes	Uncertain	No	NA	NA	No	NA	NA	NA	NA	NA	Yes	No	0.5	Medium
2058	Bruins 2016	The effect of the time interval between diagnosis of muscle-invasive bladder cancer and radical cystectomy on staging and survival: A Netherlands Cancer Registry analysis	2016	Yes	Yes	Yes	Uncertain	No	NA	NA	No	NA	NA	NA	NA	NA	NA	Yes	0.571429	Medium
2060	Brzozowska 2014	[Reasons for delay in treatment of breast cancer detected due to breast self-examination in women from the Lubelskie region].	2014	Yes	No	Yes	Uncertain	No	Yes	No	NA	NA	NA	NA	NA	NA	No	NA	0.375	Medium
2093	Caudell 2011	Diagnosis-to-treatment interval and control of locoregionally advanced head and neck cancer.	2011	Yes	Yes	No	Uncertain	No	NA	NA	No	NA	NA	NA	NA	NA	NA	No	0.285714	Medium
2096	CerdanSantacruz 2011	Colorectal cancer and its delayed diagnosis: have we improved in the past 25 years?	2011	Yes	No	No	Uncertain	No	No	No	No	No	No	No	No	No	NA	NA	0.0769231	High
2103	Chandra 2009	Delays during the diagnostic evaluation and treatment of lung cancer.	2009	Yes	No	Yes	Uncertain	No	NA	NA	No	NA	NA	NA	NA	NA	Uncertain	NA	0.285714	Medium
2130	Cheung 2011	Analysis of Wait Times and Costs During the Pen-Diagnostic Period for Non-Small Cell Lung Cancer	2011	Yes	Yes	Yes	Yes	No	NA	No	Yes	NA	NA	NA	NA	NA	NA	Yes	0.75	Low
2133	Chien 2017	Fertility preservation with ovarian stimulation and time to treatment in women with stage II-III breast cancer receiving neoadjuvant therapy.	2017	Yes	Yes	Yes	Yes	No	NA	NA	No	NA	NA	NA	NA	NA	No	NA	0.571429	Medium
2136	Chiou 2016	Assessment of duration until initial treatment and its determining factors among newly diagnosed oral cancer patients: A population-based retrospective cohort study.	2016	Yes	Yes	Yes	Yes	No	NA	NA	Yes	NA	NA	NA	NA	NA	NA	Yes	0.857143	Low
2164	Connolly 2011	Terminology and details of the diagnostic process for testis cancer.	2011	Yes	Yes	Yes	Uncertain	No	No	No	No	No	No	No	Yes	Uncertain	No	NA	0.285714	Medium
2165	Connors 2015	Breast cancer treatment among African American women in north St. Louis, Missouri.	2014	Yes	Yes	Yes	Uncertain	No	NA	NA	No	NA	NA	NA	NA	Uncertain	Yes	NA	0.5	Medium
2192	daSilva 2019	Cervical Cancer Treatment Delays and Associated Factors in a Cohort of Women From a Developing Country	2019	Yes	No	Yes	Uncertain	No	NA	NA	No	NA	NA	NA	NA	NA	Yes	NA	0.428571	Medium
2195	Dahlke 2017	Impact of Time Factors on Outcome in Patients with Head and Neck Cancer Treated with Definitive Radio(Chemo) Therapy	2017	Yes	Yes	Yes	Uncertain	No	NA	NA	No	NA	NA	NA	NA	NA	Yes	NA	0.571429	Medium
2201	DanielFernandez-deCastro 2019	The effect of diagnostic delay attributable to the healthcare system on the prognosis of colorectal cancer	2019	Yes	Yes	Yes	Uncertain	No	NA	No	No	NA	NA	NA	NA	NA	No	NA	0.375	Medium
2203	Dapkeviciute 2019	Time from Symptom Onset to Diagnosis and Treatment among Haematological Malignancies: Influencing Factors and Associated Negative Outcomes.	2019	Yes	Yes	Yes	Yes	Yes	No	No	No	No	Yes	No	Yes	Uncertain	No	NA	0.5	Medium
2215	Dusengimana 2018	Pregnancy-associated breast cancer in rural Rwanda: the experience of the Butaro Cancer Center of Excellence.	2018	Yes	Yes	Yes	Uncertain	No	No	No	No	No	No	No	No	Uncertain	No	NA	0.214286	High
2216	Dyer 2017	The contribution of body mass index to appraisal delay in colorectal cancer diagnosis: a structural equation modelling study.	2017	Yes	Yes	Yes	Uncertain	Yes	Yes	No	NA	Uncertain	No	Yes	Yes	Uncertain	No	NA	0.538462	Medium
2219	Eaglehouse 2020	Racial Comparisons in Timeliness of Colon Cancer Treatment in an Equal-Access Health System	2020	Yes	No	Yes	Uncertain	No	NA	NA	No	NA	NA	NA	NA	NA	NA	Yes	0.428571	Medium
2220	Eaglehouse 2019	Time-to-surgery and overall survival after breast cancer diagnosis in a universal health system	2019	Yes	No	Yes	Uncertain	No	NA	NA	No	NA	NA	NA	NA	NA	NA	Yes	0.428571	Medium
2247	Emery 2017	The Improving Rural Cancer Outcomes Trial: a cluster-randomised controlled trial of a complex intervention to reduce time to diagnosis in rural cancer patients in Western Australia.	2017	Yes	Yes	Yes	Yes	Yes	Yes	No	NA	Yes	Yes	Yes	No	Yes	No	NA	0.769231	Low
2257	Esteva 2013	Factors related with symptom duration until diagnosis and treatment of symptomatic colorectal cancer.	2013	Yes	Yes	Yes	Yes	Yes	Yes	No	No	No	No	Yes	Yes	Yes	Yes	NA	0.714286	Medium
2278	Favero 2010	Invasive cervical cancer during pregnancy: laparoscopic nodal evaluation before oncologic treatment delay.	2010	No	No	No	Yes	No	NA	NA	No	NA	NA	NA	NA	NA	No	NA	0.142857	High
2304	Barros 2020	Factors associated with time interval between the onset of symptoms and first medical visit in women with breast cancer	2020	Yes	Yes	Yes	Yes	No	Yes	No	NA	No	No	Yes	Yes	No	No	NA	0.538462	Medium
2308	Basaran 2014	Pregnancy-Associated Breast Cancer: Clinicopathological Characteristics of 20 Cases with a Focus on Identifiable Causes of Diagnostic Delay	2014	Yes	No	Yes	Uncertain	No	No	No	NA	NA	NA	NA	NA	NA	No	NA	0.25	Medium
2310	Basu 2019	Barriers and explanatory mechanisms in diagnostic delay in four cancers - A health-care disparity?	2019	Yes	No	Yes	Uncertain	No	Yes	No	NA	No	No	Yes	No	No	NA	NA	0.333333	Medium
2316	Baun 2019	Ovarian cancer suspicion, urgent referral and time to diagnosis in Danish general practice: a population-based study	2019	Yes	No	Yes	Uncertain	Yes	NA	Yes	No	Yes	No	Yes	Yes	No	Yes	NA	0.615385	Medium
2322	Beattie 2009	Detecting breast cancer in a general practice - Like finding needles in a haystack?.	2009	Yes	No	Yes	Uncertain	No	No	No	No	NA	NA	NA	NA	NA	No	NA	0.222222	High
2324	Becker 2014	Delay in Nephrectomy and Cancer Control Outcomes in Elderly Patients with Small Renal Masses	2014	Yes	Yes	Yes	Uncertain	No	NA	NA	No	NA	NA	NA	NA	NA	NA	Yes	0.571429	Medium
2329	Bekeny 2020	Critical evaluation of factors contributing to time to mastectomy within a single health care system	2020	Yes	Yes	Yes	Uncertain	No	NA	NA	No	NA	NA	NA	NA	NA	No	NA	0.428571	Medium
2337	Benbakhta 2015	[Determinants of patient and health system delays for women with breast cancer in Morocco, 2013].	2015	Yes	Yes	Yes	Uncertain	No	Yes	Yes	Yes	No	No	No	Yes	Yes	No	NA	0.571429	Medium
2340	Bergin 2018	Rural-Urban Disparities in Time to Diagnosis and Treatment for Colorectal and Breast Cancer.	2018	Yes	Yes	Yes	Yes	Yes	Yes	Yes	Yes	Yes	Yes	Yes	Yes	Yes	NA	Yes	1	Low
2347	Bhandari 2019	Timing of treatment in small-cell lung cancer.	2019	Yes	No	Yes	Uncertain	No	NA	NA	No	NA	NA	NA	NA	NA	NA	No	0.285714	Medium
2358	Bilimoria 2011	Wait times for cancer surgery in the United States: trends and predictors of delays.	2011	Yes	Yes	Yes	Yes	No	NA	NA	Yes	NA	NA	NA	NA	NA	NA	Yes	0.857143	Low
2373	Fisher 2010	Determinants of medical system delay in the diagnosis of colorectal cancer within the Veteran Affairs Health System.	2010	Yes	Yes	Yes	Uncertain	No	NA	No	No	NA	NA	NA	NA	NA	Yes	NA	0.5	Medium
2383	Flores-Balcazar 2020	Provider delay in treatment initiation and its influence on survival outcomes in women with operable breast cancer	2020	Yes	Yes	No	Uncertain	No	NA	NA	No	NA	NA	NA	NA	NA	No	NA	0.285714	Medium
2384	Flukes 2019	Pre-treatment wait time for head and neck cancer patients in Western Australia: description of a new metric and examination of predictive factors	2018	Yes	Yes	Yes	Uncertain	No	NA	NA	No	NA	NA	NA	NA	NA	No	NA	0.428571	Medium
2386	Foerster 2021	Dissecting the journey to breast cancer diagnosis in sub-Saharan Africa: Findings from the multicountryABC-DOcohort study	2020	Yes	Yes	Yes	Uncertain	No	Yes	Yes	Yes	No	No	No	Yes	No	NA	NA	0.538462	Medium
2393	Forrest 2014	Factors associated with timeliness of post-primary care referral, diagnosis and treatment for lung cancer: population-based, data-linkage study.	2014	Yes	Yes	Yes	Yes	Yes	NA	NA	Yes	NA	NA	NA	NA	NA	NA	Yes	1	Low
2399	Fossati 2017	Evaluating the effect of time from prostate cancer diagnosis to radical prostatectomy on cancer control: Can surgery be postponed safely?.	2017	Yes	Yes	Yes	Uncertain	No	NA	NA	No	NA	NA	NA	NA	NA	No	NA	0.428571	Medium
2401	Fouladi 2020	Factors associated with delayed diagnosis of breast cancer; a study in North-West of Iran	2020	Yes	No	No	Uncertain	No	No	No	No	No	No	No	No	Uncertain	No	NA	0.0714286	High
2410	Friese 2009	Diagnostic delay and complications for older adults with multiple myeloma.	2009	Yes	Yes	Yes	Yes	No	NA	No	No	NA	NA	NA	NA	NA	NA	Yes	0.625	Medium
2420	Fujiwara 2017	Treatment delays in oral cavity squamous cell carcinoma and association with survival	2017	Yes	No	Yes	Uncertain	No	NA	NA	No	NA	NA	NA	NA	NA	NA	Yes	0.428571	Medium
2421	Fujiya 2019	Safety of prolonged wait time for gastrectomy in clinical stage I gastric cancer	2019	Yes	No	Yes	Uncertain	No	NA	NA	No	NA	NA	NA	NA	NA	No	NA	0.285714	Medium
2436	Gangane 2016	Prevalence and Risk Factors for Patient Delay Among Women With Breast Cancer in Rural India.	2016	Yes	No	Yes	Yes	No	Yes	No	NA	No	Yes	Yes	Yes	Yes	NA	NA	0.666667	Medium
2438	Gao 2009	Factors related to delay in diagnosis of oral squamous cell carcinoma.	2009	Yes	Yes	Yes	Uncertain	No	Yes	No	No	No	No	Yes	No	Uncertain	NA	NA	0.384615	Medium
2452	Gauchy 2020	Hypercalcemia at diagnosis of diffuse large B-cell lymphoma is not uncommon and is associated with high-risk features and a short diagnosis-to-treatment interval.	2020	Yes	No	No	Uncertain	No	NA	NA	No	NA	NA	NA	NA	NA	No	NA	0.142857	High
2455	Gebremariam 2019	Time intervals experienced between first symptom recognition and pathologic diagnosis of breast cancer in Addis Ababa, Ethiopia: a cross-sectional study	2019	Yes	Yes	Yes	Yes	Yes	Yes	No	No	No	Yes	Yes	Yes	Uncertain	Yes	NA	0.714286	Medium
2459	George 2015	Diagnosis and surgical delays in African American and white women with early-stage breast cancer.	2015	Yes	Yes	Yes	Uncertain	No	NA	NA	No	NA	NA	NA	NA	NA	Yes	NA	0.571429	Medium
2473	Gilde 2018	The diagnostic pathway of oropharyngeal squamous cell carcinoma in a large U.S. healthcare system.	2017	Yes	No	Yes	Uncertain	No	No	No	NA	NA	NA	NA	NA	NA	No	NA	0.25	Medium
2486	Goel 2019	Survival impact of treatment delays in surgically managed oropharyngeal cancer and the role of human papillomavirus status	2018	Yes	No	Yes	Uncertain	No	NA	NA	No	NA	NA	NA	NA	NA	NA	Yes	0.428571	Medium
2508	Grass 2020	Impact of delay to surgery on survival in stage I-III colon cancer	2020	Yes	Yes	Yes	Uncertain	No	NA	NA	No	NA	NA	NA	NA	NA	NA	Yes	0.571429	Medium
2519	Grotenhuis 2010	Delay in Diagnostic Workup and Treatment of Esophageal Cancer	2010	Yes	Yes	Yes	Yes	No	NA	NA	No	NA	NA	NA	NA	NA	No	NA	0.571429	Medium
2529	Guizard 2016	What are the real waiting times for therapeutic management of head and neck cancer: a study in the general population in the north-west of France.	2016	Yes	Yes	Yes	Yes	No	NA	NA	No	NA	NA	NA	NA	NA	NA	Yes	0.714286	Medium
2531	Guldbrandt 2015	The role of general practice in routes to diagnosis of lung cancer in Denmark: a population-based study of general practice involvement, diagnostic activity and diagnostic intervals.	2015	Yes	Yes	Yes	Yes	Yes	NA	Yes	No	No	Yes	Yes	No	No	NA	Yes	0.692308	Medium
2533	Gullatte 2010	Religiosity, spirituality, and cancer fatalism beliefs on delay in breast cancer diagnosis in African American women.	2010	Yes	No	Yes	Uncertain	No	No	No	NA	No	No	No	Yes	No	NA	NA	0.25	Medium
2545	Gyenwali 2014	Estimates of delays in diagnosis of cervical cancer in Nepal.	2014	Yes	Yes	Yes	Yes	No	No	No	NA	No	Yes	No	No	No	NA	NA	0.416667	Medium
2568	Hansen 2011	Time intervals from first symptom to treatment of cancer: a cohort study of 2,212 newly diagnosed cancer patients.	2011	Yes	Yes	Yes	Yes	No	No	No	No	No	Yes	No	No	Uncertain	NA	NA	0.384615	Medium
2585	DeBoer 2014	Prognosis and delay of diagnosis among Kaposi's sarcoma patients in Uganda: a cross-sectional study	2014	Yes	No	Yes	Uncertain	No	NA	NA	No	No	No	Yes	No	Uncertain	No	NA	0.25	Medium
2587	delaVega 2015	Lung Cancer Diagnostic Delay in a Havana Hospital	2015	Yes	No	Yes	Uncertain	No	No	No	NA	NA	NA	NA	NA	NA	No	NA	0.25	Medium
2597	Dereje 2020	Extent and Predictors of Delays in Diagnosis of Cervical Cancer in Addis Ababa, Ethiopia: A Population-Based Prospective Study	2020	Yes	Yes	Yes	Yes	Yes	Yes	Yes	No	No	Yes	Yes	Yes	Uncertain	No	NA	0.714286	Medium
2606	Diaconescu 2011	Treatment delays in non-small cell lung cancer and their prognostic implications.	2011	Yes	No	Yes	Uncertain	No	NA	NA	No	NA	NA	NA	NA	NA	Yes	NA	0.428571	Medium
2615	Din 2015	Age and Gender Variations in Cancer Diagnostic Intervals in 15 Cancers: Analysis of Data from the UK Clinical Practice Research Datalink.	2015	Yes	Yes	Yes	Yes	No	NA	Yes	Yes	NA	NA	NA	NA	NA	NA	Yes	0.875	Low
2642	Droste 2010	Does delay in diagnosing colorectal cancer in symptomatic patients affect tumor stage and survival? A population-based observational study	2010	Yes	Yes	Yes	Uncertain	No	Yes	No	No	No	No	Yes	Yes	Uncertain	Yes	NA	0.5	Medium
2644	Heeg 2019	Hospital transfer after a breast cancer diagnosis: A population-based study in the Netherlands of the extent, predictive characteristics and its impact on time to treatment.	2019	Yes	Yes	Yes	Uncertain	No	NA	NA	No	NA	NA	NA	NA	NA	NA	No	0.428571	Medium
2649	Helsper 2017	Time to diagnosis and treatment for cancer patients in the Netherlands: Room for improvement?	2017	Yes	Yes	Yes	Yes	Yes	NA	Yes	Yes	NA	NA	NA	NA	NA	NA	Yes	1	Low
2674	Hoffman 2014	Initial response to chemotherapy, not delay in diagnosis, predicts overall survival in inflammatory breast cancer cases.	2014	Yes	Yes	No	Yes	No	NA	No	No	Uncertain	Uncertain	Uncertain	No	Uncertain	NA	No	0.230769	High
2699	Hughes 2016	Profiling for primary-care presentation, investigation and referral for liver cancers: evidence from a national audit.	2016	Yes	Yes	Yes	Yes	No	No	Yes	NA	NA	NA	NA	NA	NA	NA	Yes	0.75	Low
2701	Hulvat 2010	Time from diagnosis to definitive operative treatment of operable breast cancer in the era of multimodal imaging.	2010	Yes	Uncertain	Uncertain	Uncertain	No	NA	NA	No	NA	NA	NA	NA	NA	No	NA	0.142857	High
2706	Husein-Elahmed 2013	Factors related to delay in the diagnosis of basal cell carcinoma.	2013	Yes	Yes	No	Yes	No	Yes	Yes	NA	No	No	Yes	Yes	No	NA	NA	0.583333	Medium
2711	Iacovelli 2019	The effect of a treatment delay on outcome in metastatic renal cell carcinoma.	2019	Yes	Yes	No	Uncertain	No	NA	NA	No	NA	NA	NA	NA	NA	No	NA	0.285714	Medium
2713	Ibrahim 2012	Socio-demographic factors and reasons associated with delay in breast cancer presentation: a study in Nigerian women.	2012	Yes	No	No	Uncertain	No	No	No	NA	No	No	No	No	No	NA	NA	0.0833333	High
2715	Idowu 2009	Delay in presentation and diagnosis of adult primary intracranial neoplasms in a tropical teaching hospital: a pilot study.	2009	Yes	Yes	No	Yes	No	No	No	No	NA	NA	NA	NA	NA	No	NA	0.333333	Medium
2716	Iglay 2017	Diagnosis and treatment delays among elderly breast cancer patients with pre-existing mental illness.	2017	Yes	Yes	Yes	Yes	No	NA	No	No	NA	NA	NA	NA	NA	NA	Yes	0.625	Medium
2721	Innos 2013	Identifying women at risk for delayed presentation of breast cancer: a cross-sectional study in Estonia.	2013	Yes	Yes	Yes	Yes	No	Yes	No	NA	No	No	Yes	Yes	No	NA	NA	0.583333	Medium
2743	Jaiswal 2018	Delays in Diagnosis and Treatment of Breast Cancer: A Safety-Net Population Profile	2018	Yes	Yes	Yes	Yes	No	NA	NA	No	NA	NA	NA	NA	NA	No	NA	0.571429	Medium
2744	Jakobsen 2016	DaPeCa-2: Implementation of fast-track clinical pathways for penile cancer shortens waiting time and accelerates the diagnostic process--A comparative before-and-after study in a tertiary referral centre in Denmark.	2015	Yes	Yes	Yes	Yes	No	Yes	No	NA	NA	NA	NA	NA	NA	Yes	NA	0.75	Low
2755	Jassem 2014	Delays in diagnosis and treatment of breast cancer: a multinational analysis.	2014	Yes	Yes	No	Yes	No	Yes	No	NA	No	No	Yes	Yes	No	NA	NA	0.5	Medium
2765	Jensen 2015	Diagnostic intervals before and after implementation of cancer patient pathways - a GP survey and registry based comparison of three cohorts of cancer patients.	2015	Yes	Yes	Yes	Yes	Yes	NA	Yes	Yes	Uncertain	No	Yes	No	Yes	Yes	Yes	0.785714	Low
2769	Jensen 2016	Time from first symptom experience to help seeking for colorectal cancer patients: Associations with cognitive and emotional symptom representations.	2016	Yes	Yes	Yes	Yes	No	Yes	Yes	NA	Uncertain	No	Uncertain	No	No	NA	NA	0.5	Medium
2772	Jeon 2017	Clinical outcomes after delayed thyroid surgery in patients with papillary thyroid microcarcinoma	2017	Yes	No	No	Uncertain	No	NA	NA	No	NA	NA	NA	NA	NA	Yes	NA	0.285714	Medium
2784	Jiang 2019	Small cell lung cancer in the young: Characteristics, diagnosis and outcome data.	2019	Yes	No	No	Uncertain	No	NA	NA	No	NA	NA	NA	NA	NA	No	NA	0.142857	High
2793	Johansson 2019	Diagnostic pathways and management in women with pregnancy-associated breast cancer (PABC): no evidence of treatment delays following a first healthcare contact	2019	Yes	No	Yes	Uncertain	No	No	No	No	NA	NA	NA	NA	NA	Yes	NA	0.333333	Medium
2821	Kaing 2016	Referral patterns for oral squamous cell carcinoma in Australia: 20 years progress	2016	Yes	No	No	Uncertain	No	NA	NA	No	NA	NA	NA	NA	NA	No	NA	0.142857	High
2831	Kanarek 2014	Survival after community diagnosis of early-stage non-small cell lung cancer.	2014	Yes	No	No	Uncertain	No	NA	NA	No	NA	NA	NA	NA	NA	No	NA	0.142857	High
2835	Kang 2021	The implications of missed or misinterpreted cases of pancreatic ductal adenocarcinoma on imaging: a multi-centered population-based study	2021	Yes	Yes	Yes	Yes	Yes	NA	Yes	No	NA	NA	NA	NA	NA	NA	Yes	0.875	Low
2853	Keeble 2014	Variation in promptness of presentation among 10,297 patients subsequently diagnosed with one of 18 cancers: evidence from a National Audit of Cancer Diagnosis in Primary Care.	2014	Yes	Yes	Yes	Yes	Yes	Yes	Yes	NA	NA	NA	NA	NA	NA	NA	Yes	1	Low
2857	Kerdpon 2018	Factors related to diagnostic delay of oral squamous cell carcinoma in southern Thailand: Revisited.	2017	Yes	Yes	Yes	Yes	Yes	Yes	No	No	No	Yes	Yes	No	Yes	NA	NA	0.692308	Medium
2862	Gomez-Mercado 2020	Demographic factors associated with timely treatment in women with breast cancer, Antioquia	2020	Yes	Yes	No	Uncertain	No	NA	NA	No	NA	NA	NA	NA	NA	NA	No	0.285714	Medium
2864	Gonzalez-Barcala 2014	Timeliness of care and prognosis in patients with lung cancer.	2014	Yes	No	Yes	Uncertain	No	NA	NA	No	NA	NA	NA	NA	NA	No	NA	0.285714	Medium
2872	Khaliq 2019	Pathways to care for patients in Pakistan experiencing signs or symptoms of breast cancer	2019	Yes	Yes	Yes	Yes	Yes	No	No	NA	No	Yes	Yes	Yes	No	NA	NA	0.666667	Medium
2875	Khan 2015	Patient delay and associated factors among breast cancer patients	2015	Yes	Yes	No	Yes	No	No	No	No	No	No	No	No	Uncertain	NA	NA	0.230769	High
2877	Khanna 2017	Impact of patient demographics, tumor characteristics, and treatment type on treatment delay throughout breast cancer care at a diverse academic medical center	2017	Yes	No	No	Uncertain	No	NA	NA	No	NA	NA	NA	NA	NA	No	NA	0.142857	High
2882	Khorana 2019	Time to initial cancer treatment in the United States and association with survival over time: An observational study	2019	Yes	Yes	Yes	Yes	No	NA	NA	No	NA	NA	NA	NA	NA	NA	Yes	0.714286	Medium
2890	Kim 2016	Waiting Time Intervals for Non-small Cell Lung Cancer Diagnosis and Treatment in Alberta: Quantification of Intervals and Identification of Risk Factors Associated with Delays.	2016	Yes	Yes	Yes	Yes	Yes	NA	NA	No	NA	NA	NA	NA	NA	NA	Yes	0.857143	Low
2904	Kitano 2019	Factors associated with treatment delay in women with primary breast cancer who were referred to reproductive specialists	2019	Yes	Yes	Yes	Yes	No	NA	NA	No	NA	NA	NA	NA	NA	No	NA	0.571429	Medium
2931	Kozak 2017	Multidisciplinary Clinics for Colorectal Cancer Care Reduces Treatment Time	2017	Yes	Yes	No	Yes	No	NA	NA	No	NA	NA	NA	NA	NA	No	NA	0.428571	Medium
2938	Kruger 2020	Prolonged time to treatment initiation in advanced pancreatic cancer patients has no major effect on treatment outcome: a retrospective cohort study controlled for lead time bias and waiting time paradox	2020	Yes	No	No	Uncertain	No	NA	NA	No	NA	NA	NA	NA	NA	No	NA	0.142857	High
2941	Kulig 2016	Differences in prognosis of Siewert II and III oesophagogastric junction cancers are determined by the baseline tumour staging but not its anatomical location.	2016	Yes	No	Uncertain	Uncertain	No	NA	No	No	NA	NA	NA	NA	NA	NA	No	0.125	High
2984	Langenbach 2010	Why so late?!-delay in treatment of colorectal cancer is socially determined	2010	Yes	No	No	Yes	No	No	No	NA	Uncertain	No	No	Yes	Yes	NA	NA	0.333333	Medium
2988	Largey 2016	Lung cancer interval times from point of referral to the acute health sector to the start of first treatment.	2016	Yes	No	Yes	Yes	Yes	NA	NA	No	NA	NA	NA	NA	NA	Yes	Yes	0.75	Low
2998	Leroy 2019	Head and Neck Cancer in Belgium: Quality of Diagnostic Management and Variability Across Belgian Hospitals Between 2009 and 2014	2019	Yes	Yes	Yes	Yes	No	NA	NA	No	NA	NA	NA	NA	NA	NA	Yes	0.714286	Medium
3003	Letourneau 2017	Random start ovarian stimulation for fertility preservation appears unlikely to delay initiation of neoadjuvant chemotherapy for breast cancer	2017	Yes	Yes	Yes	Yes	No	NA	NA	No	NA	NA	NA	NA	NA	No	NA	0.571429	Medium
3026	Li 2019	Patient and Care Delays of Breast Cancer in China.	2019	No	No	Yes	Uncertain	No	Yes	No	NA	NA	NA	NA	NA	NA	Yes	NA	0.375	Medium
3029	Liao 2017	Association between the diagnosis-to-treatment interval and overall survival in Taiwanese patients with oral cavity squamous cell carcinoma.	2017	Yes	Yes	Yes	Yes	No	NA	NA	Uncertain	NA	NA	NA	NA	NA	NA	Yes	0.714286	Medium
3030	Liao 2019	Association of Delayed Time to Treatment Initiation With Overall Survival and Recurrence Among Patients With Head and Neck Squamous Cell Carcinoma in an Underserved Urban Population	2019	Yes	Yes	Uncertain	Yes	No	NA	NA	Uncertain	NA	NA	NA	NA	NA	NA	Yes	0.571429	Medium
3037	Lim 2016	Time to diagnosis of Type I or II invasive epithelial ovarian cancers: a multicentre observational study using patient questionnaire and primary care records.	2015	Yes	Yes	Yes	Yes	Yes	No	No	Yes	No	No	No	Yes	No	No	NA	0.5	Medium
3058	LoboViannaCabral 2019	Social vulnerability and breast cancer: differentials in the interval between diagnosis and treatment of women with different sociodemographic profiles	2019	Yes	Yes	Yes	Yes	No	NA	NA	No	NA	NA	NA	NA	NA	NA	Yes	0.714286	Medium
3066	Lokanatha 2020	Socioeconomic and administrative factors associated with treatment delay of esophageal and gastric carcinoma: Prospective study from a tertiary care centre in a developing country	2020	Yes	Yes	Yes	Yes	Yes	No	No	No	No	No	No	Yes	Yes	No	NA	0.5	Medium
3098	Lyratzopoulos 2015	The relative length of the patient and the primary care interval in patients with 28 common and rarer cancers.	2015	Yes	Yes	Yes	Yes	Yes	Yes	No	NA	NA	NA	NA	NA	NA	NA	Yes	0.875	Low
3112	Macia 2013	Time from (clinical or certainty) diagnosis to treatment onset in cancer patients: the choice of diagnostic date strongly influences differences in therapeutic delay by tumor site and stage.	2013	Yes	Yes	Yes	Yes	No	NA	NA	No	NA	NA	NA	NA	NA	No	NA	0.571429	Medium
3121	Majeed 2018	TIME DELAY BARRIERS IN DIAGNOSIS AND TREATMENT OF CANCER	2018	Yes	Yes	No	Yes	No	No	No	No	No	No	No	No	No	No	NA	0.214286	High
3168	Maslach 2013	Waiting time for treatment of women with breast cancer in Podlaskie Voivodeship (Poland) in view of place of residence. A population study.	2013	Yes	Yes	Yes	Yes	No	NA	NA	Yes	NA	NA	NA	NA	NA	NA	Yes	0.857143	Low
3171	Mateo 2020	Time to Surgery and the Impact of Delay in the Non-Neoadjuvant Setting on Triple-Negative Breast Cancers and Other Phenotypes	2020	Yes	No	Yes	Uncertain	No	NA	NA	No	NA	NA	NA	NA	NA	NA	Yes	0.428571	Medium
3179	Maurer 2018	Diagnosis-to-Treatment Interval Is an Important Clinical Factor in Newly Diagnosed Diffuse Large B-Cell Lymphoma and Has Implication for Bias in Clinical Trials.	2018	Yes	No	Yes	Yes	No	NA	NA	Yes	NA	NA	NA	NA	NA	No	NA	0.571429	Medium
3207	Medeiros 2019	Factors influencing delay in symptomatic presentation of breast cancer in Brazilian women	2019	Yes	Yes	Yes	Yes	Yes	Yes	No	NA	No	No	Yes	Yes	No	NA	NA	0.666667	Medium
3212	Morse 2018	Treatment delays in laryngeal squamous cell carcinoma: A national cancer database analysis	2018	Yes	Yes	Yes	Yes	No	NA	NA	No	NA	NA	NA	NA	NA	NA	Yes	0.714286	Medium
3213	Morse 2018	Treatment Times in Salivary Gland Cancer: National Patterns and Association with Survival.	2018	Yes	Yes	Yes	Yes	Uncertain	NA	NA	No	NA	NA	NA	NA	NA	NA	Yes	0.714286	Medium
3215	Morse 2018	National treatment times in oropharyngeal cancer treated with primary radiation or chemoradiation	2018	Yes	Yes	Yes	Yes	No	NA	NA	No	NA	NA	NA	NA	NA	NA	Yes	0.714286	Medium
3226	Mucha-Malecka 2019	Prognostic factors in patients with T1 glottic cancer treated with radiotherapy	2019	Yes	Yes	No	Yes	No	NA	NA	No	NA	NA	NA	NA	NA	No	NA	0.428571	Medium
3232	Mujar 2013	Delays in time to primary treatment after a diagnosis of breast cancer: Does it impact survival?	2013	Yes	Yes	Yes	Yes	No	NA	NA	No	NA	NA	NA	NA	NA	Uncertain	NA	0.571429	Medium
3241	Murchie 2020	Cancer diagnosis in Scottish primary care: Results from the National Cancer Diagnosis Audit	2020	Yes	Yes	Yes	Yes	Yes	NA	Yes	No	No	No	Yes	Yes	NA	Yes	NA	0.75	Low
3279	Neal 2014	Comparison of cancer diagnostic intervals before and after implementation of NICE guidelines: analysis of data from the UK General Practice Research Database.	2014	Yes	Yes	Yes	Yes	Yes	NA	Yes	No	NA	NA	NA	NA	NA	Yes	Yes	0.888889	Low
3297	Nieminen 2018	Causes for delay before specialist consultation in head and neck cancer.	2018	Yes	Yes	Yes	Yes	Yes	Yes	No	NA	No	No	Yes	Yes	Yes	NA	NA	0.75	Low
3299	Nieminen 2020	Factors influencing patient and health care delays in Oropharyngeal Cancer	2020	Yes	Yes	Yes	Yes	No	Yes	No	No	No	No	Yes	Yes	Yes	Uncertain	NA	0.571429	Medium
3300	Lawaetz 2018	Improved survival of head and neck cancer patients in Greenland.	2018	Yes	Yes	Yes	Yes	No	NA	NA	No	NA	NA	NA	NA	NA	Yes	Yes	0.75	Low
3316	Lee 2016	Investigating Patient and Physician Delays in the Diagnosis of Head and Neck Cancers: a Canadian Perspective.	2016	Yes	Yes	No	Yes	No	No	No	No	No	No	Yes	No	No	NA	NA	0.307692	Medium
3319	Lee 2019	The impact of diagnostic wait time on the survival of patients with diffuse large B-cell lymphoma: effect modification by the International Prognostic Index.	2019	Yes	Yes	No	Yes	No	NA	No	No	NA	NA	NA	NA	NA	No	NA	0.375	Medium
3332	Leon-Rodriguez 2017	Breast self-exam and patient interval associate with advanced breast cancer and treatment delay in Mexican women.	2017	Yes	Yes	Yes	Yes	Yes	No	No	NA	NA	NA	NA	NA	NA	No	NA	0.625	Medium
3338	Nikonova 2015	Predictors of delay in diagnosis and treatment in diffuse large B-cell lymphoma and impact on survival	2015	Yes	Yes	No	Uncertain	No	No	No	NA	NA	NA	NA	NA	NA	NA	No	0.25	Medium
3341	Nishida 2019	Impact of time from diagnosis to chemotherapy in advanced gastric cancer: A Propensity Score Matching Study to Balance Prognostic Factors	2019	Yes	Yes	Yes	Yes	No	NA	NA	Uncertain	NA	NA	NA	NA	NA	No	NA	0.571429	Medium
3375	O'Callaghan 2017	Prostate cancer outcomes and delays in care.	2017	Yes	Yes	Yes	Yes	Yes	NA	NA	No	NA	NA	NA	NA	NA	NA	Yes	0.857143	Low
3413	Ozturk 2015	Delay in Diagnosis of Testicular Cancer; A Need for Awareness Programs.	2015	Yes	Yes	No	Yes	Yes	Yes	No	NA	No	No	Yes	No	No	NA	NA	0.5	Medium
3415	Pace 2015	Delays in Breast Cancer Presentation and Diagnosis at Two Rural Cancer Referral Centers in Rwanda.	2015	Yes	Yes	Yes	Yes	No	Yes	Uncertain	NA	No	Yes	Yes	Yes	Uncertain	No	NA	0.615385	Medium
3419	Pakseresht 2014	Stage at Diagnosis and Delay in Seeking Medical Care Among Women With Breast Cancer, Delhi, India	2014	Yes	No	Yes	Uncertain	Uncertain	Yes	Uncertain	NA	No	Yes	Yes	Yes	Uncertain	NA	NA	0.5	Medium
3427	Panda 2020	Delays in Diagnosis of Cervical Cancer Among Women Attending Tertiary Care Cancer Diagnostic Hospitals in Bhubaneswar, India	2020	Yes	Yes	Uncertain	Yes	No	Yes	Uncertain	NA	No	No	No	Uncertain	Yes	No	NA	0.384615	Medium
3428	Pande 2019	Evaluation of the clinical and economic impact of delays to surgery in patients with periampullary cancer	2019	Yes	Yes	Yes	Yes	No	NA	NA	No	NA	NA	NA	NA	NA	No	NA	0.571429	Medium
3429	Pang 2019	Implementation of submandibular gland transfer: A multi-institutional study of feasibility and time to treatment	2019	Yes	Uncertain	Uncertain	Yes	No	NA	NA	No	NA	NA	NA	NA	NA	Uncertain	NA	0.285714	Medium
3438	Park 2016	A Retrospective Analysis of the Effect on Survival of Time from Diagnosis to Neoadjuvant Chemotherapy to Cystectomy for Muscle Invasive Bladder Cancer	2016	Yes	Yes	No	Yes	No	NA	NA	No	NA	NA	NA	NA	NA	No	NA	0.428571	Medium
3443	Parsons 2015	Breast cancer treatment delays in a majority minority community: Is there a difference?	2015	Yes	Yes	Yes	Yes	No	NA	NA	No	NA	NA	NA	NA	NA	Yes	NA	0.714286	Medium
3451	Patel 2012	Disparities in head and neck cancer: Assessing delay in treatment initiation	2012	Yes	Yes	Yes	Uncertain	Uncertain	NA	No	No	NA	NA	NA	NA	NA	No	NA	0.375	Medium
3458	Pedersen 2013	Patient delay in colorectal cancer patients: associations with rectal bleeding and thoughts about cancer.	2013	Yes	Yes	No	Yes	Yes	Yes	Yes	NA	No	No	Yes	No	No	NA	No	0.538462	Medium
3461	Qu 2019	Delays in prostate cancer care within a hospital network in Victoria, Australia	2019	Yes	No	Yes	Uncertain	No	NA	NA	No	NA	NA	NA	NA	NA	Yes	NA	0.428571	Medium
3470	Rabiu 2013	Delays in presentation and management of ovarian cancer in Lagos, Nigeria	2013	Yes	Yes	Yes	Yes	No	Yes	Yes	NA	NA	NA	NA	NA	NA	No	NA	0.75	Low
3472	Radzikowska 2013	Influence of delays in diagnosis and treatment on survival in small cell lung cancer patients.	2013	No	No	Yes	Uncertain	No	No	No	No	Yes	No	No	No	Uncertain	NA	No	0.142857	High
3481	Ramey 2018	Demographic disparities in delay of definitive chemoradiation for anal squamous cell carcinoma: a nationwide analysis	2018	Yes	Yes	Yes	Yes	No	NA	NA	Yes	NA	NA	NA	NA	NA	NA	Yes	0.857143	Low
3506	Redaniel 2015	Diagnostic Intervals and Its Association with Breast, Prostate, Lung and Colorectal Cancer Survival in England: Historical Cohort Study Using the Clinical Practice Research Datalink	2015	Yes	Yes	Yes	Yes	Yes	NA	Yes	Yes	NA	NA	NA	NA	NA	NA	Yes	1	Low
3507	Redondo 2009	Prognostic implications of emergency admission and delays in patients with breast cancer	2009	Yes	Yes	No	Yes	Uncertain	No	Yes	No	NA	NA	NA	NA	NA	NA	No	0.444444	Medium
3515	Renzi 2010	Delay in diagnosis and treatment of squamous cell carcinoma of the skin.	2010	Yes	Yes	Yes	Uncertain	No	Yes	Uncertain	NA	No	Yes	Yes	Yes	Yes	NA	NA	0.666667	Medium
3535	Robinson 2009	Diagnostic delay experienced among gynecological cancer patients: a nationwide survey in Denmark.	2009	Yes	Yes	Yes	Yes	No	Yes	No	NA	No	No	Yes	Yes	No	NA	NA	0.583333	Medium
3549	Memon 2013	Reasons for patient's delay in diagnosis of breast carcinoma in Pakistan.	2013	Yes	No	No	Uncertain	No	No	No	NA	No	No	No	No	No	NA	NA	0.0833333	High
3553	Menon 2019	Time intervals and routes to diagnosis for lung cancer in 10 jurisdictions: cross-sectional study findings from the International Cancer Benchmarking Partnership (ICBP)	2019	Yes	Yes	Yes	Yes	Yes	Yes	Uncertain	No	Yes	Yes	Yes	Yes	Yes	NA	Yes	0.857143	Low
3564	Millas 2015	Treatment delays of colon cancer in a safety-net hospital system	2015	Yes	No	Yes	Uncertain	No	NA	NA	No	NA	NA	NA	NA	NA	No	NA	0.285714	Medium
3570	Mimouni 2020	The Care Pathway Delays of Cervical Cancer Patient in Morocco	2020	Yes	Yes	No	Yes	No	No	No	No	Uncertain	Yes	No	No	Uncertain	Yes	NA	0.357143	Medium
3577	Mirfarhadi 2017	Predictive Factors for Diagnosis and Treatment Delay in Iranian Women with Breast Cancer	2017	Yes	Yes	Yes	Yes	No	No	No	NA	No	Yes	No	Yes	No	NA	NA	0.5	Medium
3588	Mokdad 2016	Implementation of a Voice Messaging System is Associated With Improved Time-to-Treatment and Overall Survival in Patients With Hepatocellular Carcinoma	2016	Yes	Yes	Yes	Yes	No	NA	NA	No	NA	NA	NA	NA	NA	Uncertain	NA	0.571429	Medium
3602	Moodley 2018	From symptom discovery to treatment - women's pathways to breast cancer care: a cross-sectional study.	2018	Yes	Yes	Yes	Yes	Yes	Yes	Uncertain	No	No	No	Yes	Yes	Uncertain	Uncertain	NA	0.571429	Medium
3620	Morse 2019	Hypopharyngeal Cancer Treatment Delays: Benchmarks and Survival Association	2019	Yes	Yes	No	Yes	No	NA	NA	No	NA	NA	NA	NA	NA	NA	Yes	0.571429	Medium
3622	Roland 2013	Is timing to delivery of treatment a reliable measure of quality of care for patients with colorectal adenocarcinoma?.	2013	Yes	Yes	No	Yes	No	NA	NA	No	NA	NA	NA	NA	NA	No	NA	0.428571	Medium
3624	Romanoff 2017	Association of Previous Clinical Breast Examination With Reduced Delays and Earlier-Stage Breast Cancer Diagnosis AmongWomen in Peru	2017	Yes	Uncertain	No	Uncertain	No	No	No	NA	Yes	No	No	Uncertain	No	NA	NA	0.166667	High
3666	Samson 2015	Effects of Delayed Surgical Resection on Short-Term and Long-Term Outcomes in Clinical Stage I Non-Small Cell Lung Cancer.	2015	Yes	Yes	Yes	Uncertain	No	NA	NA	No	NA	NA	NA	NA	NA	NA	Yes	0.571429	Medium
3682	Sargeran 2009	Delayed diagnosis of oral cancer in Iran: challenge for prevention.	2009	Yes	Yes	No	Yes	No	Yes	Yes	No	No	Yes	Yes	Yes	Yes	Uncertain	NA	0.642857	Medium
3691	Sawicki 2013	Reasons for delay in diagnosis and treatment of lung cancer among patients in Lublin Voivodeship who were consulted in Thoracic Surgery Department	2013	Yes	Yes	Yes	Yes	No	No	No	NA	No	No	No	No	Uncertain	NA	NA	0.333333	Medium
3712	Schutte 2020	Impact of optimizing diagnostic workup and reducing the time to treatment in head and neck cancer	2020	Yes	Yes	Yes	Yes	No	NA	NA	No	NA	NA	NA	NA	NA	Yes	NA	0.714286	Medium
3726	Seiber 2015	Disparities in Colorectal Cancer Treatment Delay Within Appalachia--The Role of For-Profit Hospitals.	2015	Yes	Yes	Yes	Yes	No	NA	NA	NA	NA	NA	NA	NA	NA	NA	Yes	0.833333	Low
3728	Sekeres 2009	Time from diagnosis to treatment initiation predicts survival in younger, but not older, acute myeloid leukemia patients	2009	Yes	Yes	No	Yes	No	NA	NA	No	NA	NA	NA	NA	NA	NA	Yes	0.571429	Medium
3730	Sell 2020	Symptoms and diagnostic delays in bladder cancer with high risk of recurrence: results from a prospective FinnBladder 9 trial	2020	Yes	No	Yes	Uncertain	No	Yes	Yes	NA	No	No	Yes	Yes	No	NA	NA	0.5	Medium
3733	Seneviratne 2015	Treatment delay for Maori women with breast cancer in New Zealand.	2015	Yes	No	Yes	Uncertain	No	NA	NA	No	NA	NA	NA	NA	NA	No	Yes	0.375	Medium
3742	Serrell 2019	Prostate cancer navigation: initial experience and association with time to care.	2019	Yes	Yes	Yes	Yes	No	NA	NA	No	NA	NA	NA	NA	NA	NA	Yes	0.714286	Medium
3754	Teppo 2009	Comorbidity and diagnostic delay in cancer of the larynx, tongue and pharynx.	2009	Yes	Yes	Yes	Yes	No	Yes	No	No	NA	NA	NA	NA	NA	Yes	NA	0.666667	Medium
3776	Tolstrup 2017	Greenlandic patients with colorectal cancer: symptomatology, primary investigations and differences in diagnostic intervals between Nuuk and the rest of the country.	2017	Yes	Yes	Yes	Yes	No	NA	Yes	No	NA	NA	NA	NA	NA	Yes	Yes	0.777778	Low
3777	Tomaszewski 2014	Care transitions between hospitals are associated with treatment delay for patients with muscle invasive bladder cancer.	2014	Yes	Yes	Yes	Yes	No	NA	NA	No	NA	NA	NA	NA	NA	NA	Yes	0.714286	Medium
3790	Torring 2019	Advanced-stage cancer and time to diagnosis: An International Cancer Benchmarking Partnership (ICBP) cross-sectional study.	2019	Yes	Yes	Yes	Yes	Yes	NA	Yes	Yes	Yes	Yes	Yes	Yes	Yes	NA	Uncertain	0.923077	Low
3791	Torring 2012	Diagnostic interval and mortality in colorectal cancer: U-shaped association demonstrated for three different datasets.	2012	Yes	Yes	Yes	Yes	No	NA	Yes	No	No	No	Yes	Yes	No	Yes	NA	0.615385	Medium
3792	Torring 2013	Evidence of increasing mortality with longer diagnostic intervals for five common cancers: a cohort study in primary care.	2013	Yes	Uncertain	Yes	Yes	Yes	NA	Uncertain	No	No	Uncertain	Yes	Yes	Yes	NA	Yes	0.615385	Medium
3800	Trepanier 2020	The Impact of Delays to Definitive Surgical Care on Survival in Colorectal Cancer Patients	2020	Yes	Yes	No	Yes	No	NA	NA	No	NA	NA	NA	NA	NA	No	NA	0.428571	Medium
3814	Tumati 2019	Association between treatment delays and oncologic outcome in patients treated with surgery and radiotherapy for head and neck cancer	2019	Yes	Yes	Yes	Yes	No	NA	NA	No	NA	NA	NA	NA	NA	No	NA	0.571429	Medium
3824	Unger-Saldana 2019	Breast Cancer Diagnostic Delays Among Young Mexican Women Are Associated With a Lack of Suspicion by Health Care Providers at First Presentation.	2019	Yes	Yes	Yes	Yes	Yes	NA	Yes	No	Yes	Yes	Yes	No	No	NA	NA	0.75	Low
3827	Unger-Saldana 2015	Health system delay and its effect on clinical stage of breast cancer: Multicenter study.	2015	Yes	Yes	Yes	Yes	Yes	Yes	No	No	Yes	No	Yes	No	Uncertain	Yes	NA	0.642857	Medium
3841	Peltola 2018	Characteristics and Outcomes of 79 Patients with an Insulinoma: A Nationwide Retrospective Study in Finland	2018	Uncertain	Yes	Yes	Yes	No	NA	No	No	NA	NA	NA	NA	NA	Yes	Yes	0.555556	Medium
3848	Perlow 2018	Assessment of Oropharyngeal and Laryngeal Cancer Treatment Delay in a Private and Safety Net Hospital System.	2018	Yes	Yes	No	Yes	No	NA	NA	No	NA	NA	NA	NA	NA	Yes	NA	0.571429	Medium
3868	Pineros 2011	[Delay for diagnosis and treatment of breast cancer in Bogota, Colombia].	2011	Yes	Yes	Uncertain	Yes	No	NA	Yes	No	No	No	Yes	Uncertain	Uncertain	Yes	NA	0.461538	Medium
3883	Polesel 2017	The impact of time to treatment initiation on survival from head and neck cancer in north-eastern Italy.	2017	Yes	Yes	No	Yes	No	NA	NA	Yes	NA	NA	NA	NA	NA	NA	Yes	0.714286	Medium
3890	Poum 2014	Factors associated with delayed diagnosis of breast cancer in northeast Thailand.	2014	Yes	Yes	No	Uncertain	Uncertain	Yes	No	No	No	No	Yes	Yes	No	NA	NA	0.384615	Medium
3894	Pozsgai 2019	Wait times to diagnosis and treatment in patients with colorectal cancer in Hungary.	2019	Yes	Yes	No	Yes	No	NA	Yes	No	NA	NA	NA	NA	NA	Yes	No	0.555556	Medium
3904	Pruitt 2013	Do diagnostic and treatment delays for colorectal cancer increase risk of death?	2013	Yes	Yes	Yes	Yes	No	NA	No	Yes	NA	NA	NA	NA	NA	NA	Yes	0.75	Low
3918	vanErp 2020	Time to diagnosis of symptomatic gastric and oesophageal cancer in the Netherlands: Where is the room for improvement?	2020	Yes	Yes	Yes	Yes	Yes	Yes	Yes	Yes	NA	NA	NA	NA	NA	Yes	Yes	1	Low
3920	vanHarten 2015	Determinants of treatment waiting times for head and neck cancer in the Netherlands and their relation to survival.	2015	Yes	Yes	Yes	Yes	No	NA	NA	Yes	NA	NA	NA	NA	NA	NA	Yes	0.857143	Low
3921	VanHout 2011	Determinants of patient's and doctor's delay in diagnosis and treatment of colorectal cancer.	2011	Yes	Yes	Yes	Uncertain	No	No	No	Yes	NA	NA	NA	NA	NA	NA	Yes	0.555556	Medium
3926	Vandborg 2011	Reasons for diagnostic delay in gynecological malignancies.	2011	Yes	Yes	Yes	Yes	Yes	Yes	Yes	No	Yes	Yes	Yes	Yes	Yes	NA	Yes	0.928571	Low
3932	Varela-Centelles 2017	Assessment of time intervals in the pathway to oral cancer diagnosis in north-westerm Spain. Relative contribution of patient interval.	2017	Yes	Yes	No	Yes	Yes	Yes	Yes	No	No	No	Yes	Yes	Yes	Yes	NA	0.714286	Medium
3947	Vesna 2020	Assessment of possible delays in referrals, diagnostics procedures and first treatment in Slovenian bladder and kidney cancer patients	2020	Yes	No	Yes	Yes	Yes	No	No	No	NA	NA	NA	NA	NA	NA	Yes	0.555556	Medium
3958	Vinod 2017	Does timeliness of care in Non-Small Cell Lung Cancer impact on survival?	2017	Yes	Yes	Yes	Yes	No	NA	NA	Yes	NA	NA	NA	NA	NA	NA	Yes	0.857143	Low
3960	Visser 2016	Waiting Time from Diagnosis to Treatment has no Impact on Survival in Patients with Esophageal Cancer	2016	Yes	Yes	No	Uncertain	No	NA	NA	No	NA	NA	NA	NA	NA	No	NA	0.285714	Medium
3961	Visser 2017	Impact of diagnosis-to-treatment waiting time on survival in esophageal cancer patients - A population-based study in The Netherlands	2017	Yes	Yes	Yes	Yes	No	NA	NA	No	NA	NA	NA	NA	NA	NA	Yes	0.714286	Medium
3980	Walter 2016	Symptoms and patient factors associated with longer time to diagnosis for colorectal cancer: results from a prospective cohort study.	2016	Yes	Yes	Yes	Yes	Yes	Yes	Yes	NA	No	Yes	No	Yes	Yes	Yes	NA	0.846154	Low
3982	Walter 2016	Symptoms and patient factors associated with diagnostic intervals for pancreatic cancer (SYMPTOM pancreatic study): a prospective cohort study.	2016	Yes	Yes	Yes	Yes	Yes	No	No	Yes	No	Yes	No	Yes	Yes	Yes	NA	0.714286	Medium
3993	Wang 2009	TIME TO TREATMENT IN PATIENTS WITH STAGE III NON-SMALL CELL LUNG CANCER	2009	Yes	Yes	Yes	Yes	No	NA	NA	No	NA	NA	NA	NA	NA	No	NA	0.571429	Medium
4000	Wanis 2017	Do Moderate Surgical Treatment Delays Influence Survival in Colon Cancer?.	2017	Yes	Yes	Yes	Yes	No	NA	NA	No	NA	NA	NA	NA	NA	NA	Yes	0.714286	Medium
4015	Webber 2020	Colonoscopy resource availability and its association with the colorectal cancer diagnostic interval: A population-based cross-sectional study	2020	Yes	Yes	Yes	Yes	Yes	NA	Yes	No	NA	NA	NA	NA	NA	NA	Yes	0.875	Low
4017	Webster 2019	Missed opportunities for oral cancer screening in Australia.	2019	Yes	No	No	Uncertain	No	No	No	No	No	Yes	No	Yes	No	NA	NA	0.230769	High
4037	White 2020	The pathway to diagnosis and treatment for surgically managed lung cancer patients	2020	Yes	Yes	Yes	Yes	Yes	Yes	No	Yes	No	Yes	Yes	Yes	Yes	NA	No	0.785714	Low
4042	Widhe 2011	Diagnostic difficulties and delays with chest wall chondrosarcoma: A Swedish population based Scandinavian Sarcoma Group study of 106 patients	2010	Yes	Yes	Yes	Uncertain	No	No	No	NA	NA	NA	NA	NA	NA	NA	Yes	0.5	Medium
4045	Williams 2010	Factors Associated with Delays to Diagnosis and Treatment of Breast Cancer in Women in a Louisiana Urban Safety Net Hospital	2010	Yes	Yes	Yes	Yes	No	NA	No	Yes	NA	NA	NA	NA	NA	NA	Yes	0.75	Low
4058	Wright 2010	Time from Diagnosis to Surgical Treatment of Breast Cancer: Factors Influencing Delays in Initiating Treatment	2010	Yes	No	No	Uncertain	No	NA	NA	No	NA	NA	NA	NA	NA	NA	No	0.142857	High
4064	Xavier 2016	Delay in cutaneous melanoma diagnosis: Sequence analyses from suspicion to diagnosis in 211 patients.	2016	Yes	Yes	Yes	Yes	No	Uncertain	No	NA	No	No	Uncertain	Yes	No	NA	NA	0.416667	Medium
4070	Xu 2019	Surgical Delay Is Associated with Improved Survival in Hepatocellular Carcinoma: Results of the National Cancer Database	2019	Yes	Yes	Yes	Uncertain	No	NA	NA	No	NA	NA	NA	NA	NA	NA	Yes	0.571429	Medium
4075	Yaman 2009	Factors affecting the interval from diagnosis to treatment in patients with lung cancer	2009	Yes	No	Yes	Yes	No	No	No	NA	NA	NA	NA	NA	NA	No	NA	0.375	Medium
4085	Yang 2014	Pregnancy-associated breast cancer in Taiwanese women: potential treatment delay and impact on survival.	2014	Yes	Yes	Yes	Uncertain	No	NA	NA	No	NA	NA	NA	NA	NA	No	NA	0.428571	Medium
4104	Yorio 2009	Lung cancer diagnostic and treatment intervals in the United States: a health care disparity?.	2009	Yes	Yes	Yes	Yes	No	NA	NA	No	NA	NA	NA	NA	NA	No	NA	0.571429	Medium
4116	Yuan 2016	Factors related to breast cancer detection mode and time to diagnosis in Alberta, Canada: a population-based retrospective cohort study.	2016	Yes	Yes	Yes	Yes	No	NA	No	No	NA	NA	NA	NA	NA	No	Yes	0.555556	Medium
4123	Yurdakul 2015	Patient and physician delay in the diagnosis and treatment of non-small cell lung cancer in Turkey.	2015	Yes	Yes	Yes	Yes	Yes	Yes	Yes	No	No	No	No	Yes	Uncertain	No	NA	0.571429	Medium
4126	Shah 2020	Socioeconomic disparity trends in diagnostic imaging, treatments, and survival for nonsmall cell lung cancer: 2007-2016	2020	Yes	Uncertain	Yes	Yes	No	NA	NA	No	NA	NA	NA	NA	NA	NA	Yes	0.571429	Medium
4139	Sharma 2016	Clinical impact of prolonged diagnosis to treatment interval (DTI) among patients with oropharyngeal squamous cell carcinoma.	2016	Yes	Yes	Uncertain	Yes	No	NA	NA	No	NA	NA	NA	NA	NA	NA	Yes	0.571429	Medium
4169	Sikdar 2017	Factors associated with mode of colorectal cancer detection and time to diagnosis: a population level study.	2017	Yes	Yes	Yes	Yes	Yes	NA	Yes	No	NA	NA	NA	NA	NA	NA	Yes	0.875	Low
4179	Singal 2013	Therapeutic Delays Lead to Worse Survival Among Patients With Hepatocellular Carcinoma	2013	Yes	No	Yes	No	No	NA	NA	No	NA	NA	NA	NA	NA	No	NA	0.285714	Medium
4180	Singh 2010	Wait times from presentation to treatment for colorectal cancer: a population-based study.	2010	Yes	Yes	Yes	Uncertain	No	NA	Yes	No	NA	NA	NA	NA	NA	NA	Yes	0.625	Medium
4182	Singh 2012	Trends in time to diagnosis of colon cancer and impact on clinical outcomes	2012	Yes	Yes	Yes	Yes	No	NA	Yes	Yes	NA	NA	NA	NA	NA	NA	Yes	0.875	Low
4202	Smith 2016	Assessing delays in laryngeal cancer treatment.	2016	Yes	Yes	No	Yes	No	Yes	Yes	No	NA	NA	NA	NA	NA	Yes	NA	0.666667	Medium
4207	SoaresFerreira 2017	Treatment delays among women with breast cancer in a low socio-economic status region in Brazil	2017	Yes	No	Yes	Yes	No	NA	NA	No	NA	NA	NA	NA	NA	Yes	NA	0.571429	Medium
4234	Stevens 2010	Wait times in prostate cancer diagnosis and radiation treatment	2010	Yes	Yes	No	Yes	No	NA	NA	No	No	No	Uncertain	No	Yes	Yes	NA	0.416667	Medium
4244	Stornello 2020	Diagnostic delay does not influence survival of pancreatic cancer patients	2020	Yes	Yes	Yes	Uncertain	No	NA	Yes	No	No	No	Yes	Yes	No	NA	NA	0.5	Medium
4246	Strohl 2016	Surgical wait time: A new health indicator in women with endometrial cancer	2016	Yes	Yes	Yes	Yes	No	NA	NA	No	NA	NA	NA	NA	NA	NA	Yes	0.714286	Medium
4257	Sue 2013	Does time to definitive treatment matter in patients with ductal carcinoma in situ?.	2013	Yes	Yes	No	Uncertain	No	NA	NA	No	NA	NA	NA	NA	NA	No	NA	0.285714	Medium
4263	Sulu 2011	Delays in the diagnosis and treatment of non-small-cell lung cancer.	2011	Yes	Yes	No	Yes	No	No	No	No	No	No	No	No	Uncertain	No	NA	0.214286	High
4275	Swann 2018	Diagnosing cancer in primary care: results from the National Cancer Diagnosis Audit.	2018	Yes	Yes	Yes	Yes	No	NA	Yes	No	No	No	Yes	Yes	NA	Yes	NA	0.666667	Medium
4313	Zarcos-Pedrinaci 2018	Factors Associated with Prolonged Patient-Attributable Delay in the Diagnosis of Colorectal Cancer.	2018	Yes	Yes	Yes	Yes	No	Yes	No	NA	No	No	Yes	No	No	NA	NA	0.5	Medium
4314	Zdravkovic 2009	Implication of late diagnosis for survival of patients with colorectal carcinoma	2009	Yes	Yes	Uncertain	Uncertain	No	No	No	No	No	No	No	Uncertain	Uncertain	No	NA	0.142857	High
4319	Zhang 2015	The effects of geography on survival in patients with oral cavity squamous cell carcinoma	2015	Yes	Uncertain	Yes	Uncertain	No	NA	NA	No	NA	NA	NA	NA	NA	No	Yes	0.375	Medium
4320	Zhang 2019	Patient delay and associated factors among Chinese women with breast cancer: A cross-sectional study.	2019	Yes	Uncertain	Uncertain	Uncertain	No	No	Yes	NA	No	No	Yes	No	No	NA	NA	0.25	Medium
4329	Zhang 2019	Factors associated with delay in presentation among patients for oral cancer	2019	Yes	Yes	No	Yes	No	Yes	Yes	NA	No	No	Yes	No	No	NA	NA	0.5	Medium
4546	Kozielski 2012	Lung cancer in patients under the age of 40 years	2012	Yes	Yes	Yes	Yes	No	No	No	NA	NA	NA	NA	NA	NA	No	NA	0.5	Medium
4559	Howell 2013	Time-to-diagnosis and symptoms of myeloma, lymphomas and leukaemias: A report from the Haematological malignancy Research Network	2013	Yes	Yes	Yes	Yes	No	Yes	No	No	No	No	Yes	Yes	No	NA	NA	0.538462	Medium
4842	Nilbert 2010	Delays in the management of retroperitoneal sarcomas	2010	Yes	Yes	Yes	Uncertain	No	Yes	Uncertain	NA	NA	NA	NA	NA	NA	Uncertain	NA	0.5	Medium
5225	Brinkerhoff 2012	Diagnosis to treatment interval and outcome in patients with locally-advanced squamous cell carcinoma of the head and neck in a veterans affairs medical center	2012	Yes	Yes	Yes	Uncertain	No	NA	NA	No	NA	NA	NA	NA	NA	No	Yes	0.5	Medium
5898	Bustami 2014	Variations in time to receiving first surgical treatment for breast cancer as a function of racial/ethnic background: A cohort study	2014	Yes	Yes	Yes	Yes	No	NA	NA	No	NA	NA	NA	NA	NA	No	NA	0.571429	Medium
6004	Lohlun 2015	A prospective study on the impact of waiting times for radiotherapy for cervical cancer at Charlotte Maxeke Johannesburg Academic Hospital	2015	No	No	Yes	Uncertain	No	NA	NA	No	NA	NA	NA	Uncertain	NA	Uncertain	NA	0.125	High
6213	Li 2015	Clinical investigation into the initial diagnosis and treatment of 539 patients with IV stage lung cancer	2017	No	No	No	Uncertain	No	No	No	NA	NA	NA	NA	NA	NA	No	NA	0	High
6695	BuvarpDyrop 2016	Routes to Diagnosis for Suspected Sarcoma: The Impact of Symptoms and Clinical Findings on the Diagnostic Process	2016	Yes	Yes	Yes	Yes	Yes	Yes	Yes	No	No	Yes	Yes	Yes	Yes	Yes	NA	0.857143	Low
6741	Dolly 2016	A delay from diagnosis to treatment is associated with a decreased overall survival for patients with endometrial cancer	2016	Yes	Yes	Yes	Yes	No	NA	NA	Yes	NA	NA	NA	NA	NA	Yes	NA	0.857143	Low
7126	Zanaty 2017	Does surgical delay for radical prostatectomy affect patient pathological outcome? A retrospective analysis from a Canadian cohort	2017	Yes	No	No	Uncertain	No	NA	NA	No	NA	NA	NA	NA	NA	NA	Uncertain	0.142857	High
7474	Ran 2018	Impact of symptom to presentation delay and treatment delay on prognosis of colorectal cancer patients	2018	Yes	Uncertain	Yes	Uncertain	No	No	No	NA	No	Uncertain	Uncertain	Yes	Uncertain	Uncertain	NA	0.230769	High
7716	Lawrenz 2018	Adult Primary Bone Sarcoma and Time to Treatment Initiation: An Analysis of the National Cancer Database	2018	Yes	Yes	Yes	Yes	No	NA	NA	No	NA	NA	NA	NA	NA	NA	Yes	0.714286	Medium
7823	Kan 2018	Risk factors involved in treatment delays and differences in treatment type for patients with prostate cancer by risk category in an academic safety net hospital	2018	Yes	No	Yes	Uncertain	No	NA	NA	No	NA	NA	NA	NA	NA	No	NA	0.285714	Medium
8303	Patel 2019	The effect of time from biopsy to radical prostatectomy on adverse pathologic outcomes	2019	Yes	Yes	No	Yes	No	NA	NA	No	NA	NA	NA	NA	NA	No	NA	0.428571	Medium
8320	Lovejoy 2019	Evaluation of surgical disparities between african American and european American women treated for breast cancer within an equal-access military healthcare system	2019	Yes	Yes	Yes	Yes	No	NA	NA	No	NA	NA	NA	NA	NA	NA	No	0.571429	Medium
8373	Humphrys 2020	Patient symptom experience prior to a diagnosis of oesophageal or gastric cancer: A multi-methods study	2020	Yes	Yes	Yes	Yes	Yes	Yes	Yes	NA	Yes	Yes	Yes	Yes	No	NA	NA	0.916667	Low
8419	Jin 2020	Non-small cell lung cancer in young patients: An analysis of clinical, pathologic and tnm stage characteristics compared to the elderly	2020	Yes	No	No	Uncertain	No	No	No	NA	NA	NA	NA	NA	NA	No	NA	0.125	High
8425	Mielczarek 2020	Diagnostic and treatment delays among patients with primary bladder cancer in Poland: A survey study	2020	Yes	Yes	No	Yes	No	Yes	Uncertain	No	No	No	Yes	Yes	Uncertain	Uncertain	NA	0.428571	Medium
8469	Huang 2020	Delayed surgery after histologic or radiologic-diagnosed clinical stage I lung adenocarcinoma	2020	Yes	Yes	No	Yes	No	NA	NA	No	NA	NA	NA	NA	NA	Yes	NA	0.571429	Medium
8475	Kompelli 2020	An assessment of racial differences in epidemiological, clinical and psychosocial factors among head and neck cancer patients at the time of surgery	2020	Yes	No	No	Uncertain	No	NA	NA	No	NA	NA	NA	NA	NA	No	NA	0.142857	High
8649	Rittitit 2020	The time interval in patients care process of colorectal cancer a hospital based study in khon kaen, thailand	2020	Yes	Yes	Yes	Yes	No	Yes	Yes	No	No	No	Yes	No	Yes	No	NA	0.571429	Medium
8680	Zivkovic 2014	Effect of delays on survival in patients with lung carcinoma in Montenegro.	2014	Yes	No	Yes	Uncertain	No	No	No	No	No	No	No	No	Yes	No	NA	0.214286	High
8847	Wang 2018	Diagnostic Pathway of Oral Cavity Cancer in an Integrated Health Care System.	2018	Yes	Yes	Uncertain	Yes	No	Yes	No	Yes	NA	NA	NA	NA	NA	Yes	Yes	0.7	Medium
8848	Wang 2017	Nasopharyngeal Carcinoma Diagnostic Challenge in a Nonendemic Setting: Our Experience with 101 Patients.	2017	Yes	No	No	Uncertain	No	No	No	No	NA	NA	NA	NA	NA	No	No	0.1	High
8886	Vidaver 2016	Typical Time to Treatment of Patients With Lung Cancer in a Multisite, US-Based Study.	2016	Yes	Yes	Yes	Yes	Yes	NA	No	No	No	Yes	Yes	Yes	Yes	Yes	NA	0.769231	Low
8966	Talavera-Belmonte 2018	Subungual Melanoma: A Descriptive Study of 34 Patients.	2018	Yes	Yes	Yes	Yes	No	No	No	No	NA	NA	NA	NA	NA	No	NA	0.444444	Medium
9062	Yau 2010	Delayed presentation of symptomatic breast cancers in Hong Kong: experience in a public cancer centre.	2010	Yes	Yes	Yes	Yes	No	Yes	Yes	NA	No	Yes	Uncertain	Yes	No	NA	NA	0.666667	Medium
9129	Shieh 2014	Delayed time from first medical visit to diagnosis for breast cancer patients in Taiwan.	2014	Yes	Yes	Yes	Yes	Uncertain	NA	Yes	No	Yes	Yes	Yes	No	No	NA	NA	0.666667	Medium
9187	Scott 2016	Rectal cancer in patients under the age of 50 years: the delayed diagnosis.	2015	Yes	No	No	Uncertain	No	Yes	No	NA	NA	NA	NA	NA	NA	No	NA	0.25	Medium
9433	Otieno 2010	Provider delay in the diagnosis and initiation of definitive treatment for breast cancer patients.	2010	Yes	Yes	Yes	Yes	No	NA	NA	No	NA	NA	NA	NA	NA	No	NA	0.571429	Medium
9457	O'Leary 2013	The wait time creep: changes in the surgical wait time for women with uterine cancer in Ontario, Canada, during 2000-2009.	2013	Yes	Yes	Yes	Uncertain	No	NA	NA	No	NA	NA	NA	NA	NA	NA	No	0.428571	Medium
9476	Odongo 2015	Patient delay factors in women presenting with breast cancer in a low income country.	2015	Yes	Uncertain	No	Uncertain	No	Yes	Yes	NA	Yes	Yes	Yes	Uncertain	No	NA	NA	0.5	Medium
9761	Radzikowska 2012	The impact of timeliness of care on survival in non-small cell lung cancer patients.	2012	Yes	No	No	Uncertain	No	No	No	No	NA	NA	NA	NA	NA	NA	No	0.111111	High
9836	McLaughlin 2012	Effect on survival of longer intervals between confirmed diagnosis and treatment initiation among low-income women with breast cancer.	2012	Yes	Yes	Yes	Yes	No	NA	NA	No	NA	NA	NA	NA	NA	NA	Yes	0.714286	Medium
9891	Marella 2018	The diagnostic delay of oral carcinoma.	2018	No	No	No	Uncertain	No	No	No	NA	NA	NA	NA	NA	NA	No	NA	0	High
9913	Lee 2011	Head and neck cancer: possible causes for delay in diagnosis and treatment.	2011	Yes	Yes	No	Yes	No	Yes	No	No	No	No	Yes	No	Uncertain	No	NA	0.357143	Medium
9938	Law 2009	Treatment delay in rectal cancer.	2009	Yes	No	No	Uncertain	No	NA	NA	No	NA	NA	NA	NA	NA	No	NA	0.142857	High
9972	Kumar 2019	Delays in Diagnosis and Treatment of Breast Cancer and the Pathways of Care: A Mixed Methods Study from a Tertiary Cancer Centre in North East India.	2019	Yes	No	Yes	Yes	No	Yes	Yes	NA	No	No	Yes	Yes	No	NA	NA	0.583333	Medium
10033	Kolude 2013	Stages of delay in oral cancer care evaluated at a tertiary health centre.	2013	Yes	No	No	Uncertain	No	NA	NA	No	NA	NA	NA	NA	NA	No	NA	0.142857	High
10168	Gao 2016	Risk factors and negative consequences of patient's delay for penile carcinoma.	2016	Yes	No	Yes	Uncertain	No	Yes	No	NA	No	No	Yes	No	Yes	No	NA	0.384615	Medium
10348	Lim 2013	Measuring the nature and duration of symptoms of cervical cancer in young women: developing an interview-based approach.	2013	Yes	Yes	Yes	Yes	Yes	Yes	Yes	No	No	Yes	Yes	Yes	No	NA	NA	0.769231	Low
10351	Lijkendijk 2010	[Introduction of integrated cancer pathway shortens diagnostic delay in bladder cancer].	2010	Yes	Yes	Yes	Yes	No	Yes	No	NA	NA	NA	NA	NA	NA	No	NA	0.625	Medium
10376	Levy 2018	The Frequency and Prognostic Value of Neutrophilia in Chronic Lymphocytic Leukemia.	2018	No	No	No	Uncertain	No	NA	NA	No	NA	NA	NA	NA	NA	No	NA	0	High
10378	Leveque 2014	[An analysis of treatment delays of thoracic cancers: a prospective study].	2014	Yes	Yes	No	Yes	No	NA	NA	No	No	No	No	Yes	No	NA	NA	0.363636	Medium
10425	Faye 2016	Pattern of chronic myeloid leukemia in the imatinib era in a Sub-Saharan African setting.	2016	Yes	No	Yes	Uncertain	No	No	No	No	Uncertain	Uncertain	Uncertain	Uncertain	Uncertain	No	NA	0.142857	High
10455	Ermiah 2012	Diagnosis delay in Libyan female breast cancer.	2012	Yes	No	Uncertain	Yes	No	Yes	No	No	No	No	Yes	Yes	No	NA	NA	0.384615	Medium
10555	Chappidi 2017	Evaluation of gender-based disparities in time from initial haematuria presentation to upper tract urothelial carcinoma diagnosis: analysis of a nationwide insurance claims database.	2017	Yes	Yes	Yes	Uncertain	No	NA	No	No	NA	NA	NA	NA	NA	NA	Yes	0.5	Medium
10877	Goel 2020	Treatment delays in surgically managed sinonasal cancer and association with survival.	2019	Yes	No	Yes	Uncertain	No	NA	NA	No	NA	NA	NA	NA	NA	NA	Yes	0.428571	Medium
10914	George 2012	Early symptoms of bone and soft tissue sarcomas: could they be diagnosed earlier?.	2012	Yes	Yes	No	Uncertain	No	Yes	No	No	No	No	Yes	No	Uncertain	NA	NA	0.307692	Medium
10999	Bonfill 2017	Clinical interval and diagnostic characteristics in a cohort of bladder cancer patients in Spain: a multicenter observational study.	2017	Yes	Yes	No	Uncertain	No	NA	No	No	No	No	No	No	Uncertain	No	NA	0.153846	High
11017	Baishya 2015	A Pilot Study on Factors Associated with Presentation Delay in Patients Affected with Head and Neck Cancers.	2015	Yes	No	No	Uncertain	No	Yes	No	NA	No	No	No	Yes	No	NA	NA	0.25	Medium
11105	Altman 2017	Examining the Effects of Time to Diagnosis, Income, Symptoms, and Incidental Detection on Overall Survival in Epithelial Ovarian Cancer: Manitoba Ovarian Cancer Outcomes (MOCO) Study Group.	2017	Yes	Yes	Yes	Yes	No	NA	Yes	Yes	NA	NA	NA	NA	NA	Yes	No	0.777778	Low
11106	Al-Rajhi 2009	Nasopharyngeal carcinoma in Saudi Arabia: clinical presentation and diagnostic delay.	2009	Yes	No	Yes	Yes	No	Yes	No	No	No	No	Yes	Yes	No	No	NA	0.428571	Medium
11281	Cohn 2014	Sex disparities in diagnosis of bladder cancer after initial presentation with hematuria: a nationwide claims-based investigation.	2014	Yes	Yes	Yes	Uncertain	No	NA	No	No	NA	NA	NA	NA	NA	NA	Yes	0.5	Medium
11295	Cicchiello 2016	An assessment of clinical pathways and missed opportunities for the diagnosis of nodular melanoma versus superficial spreading melanoma.	2016	Yes	Yes	Yes	Yes	No	Yes	Yes	No	No	No	Yes	No	No	NA	NA	0.538462	Medium
11351	BenFatma 2018	What could be the reasons of late diagnosis of breast cancer in Tunisia?.	2018	Yes	Yes	No	Yes	No	No	Yes	NA	No	Uncertain	No	No	Yes	No	NA	0.384615	Medium
11374	Baughan 2009	Auditing the diagnosis of cancer in primary care: the experience in Scotland.	2009	Yes	Yes	Yes	Yes	No	No	No	NA	Uncertain	Uncertain	No	No	Yes	Yes	NA	0.461538	Medium
11438	Abu-Helalah 2016b	Delay in Presentation, Diagnosis and Treatment for Colorectal Cancer Patients in Jordan.	2016	Yes	No	Yes	Uncertain	No	No	No	Uncertain	No	No	No	No	No	No	NA	0.142857	High
11454	Skrabek 2016	Examining the pathway to diagnosis and treatment of lymphoma in Manitoba: patient and system factors resulting in delay	2016	Yes	Yes	Yes	Yes	No	NA	NA	Yes	NA	NA	NA	NA	NA	NA	Yes	0.857143	Low
11455	Hess 2011	A review of the delay in diagnosis and management of breast lumps in the Theewaterskloof sub district in the Western Capel ETD Search	2015	Yes	Yes	Yes	Yes	No	NA	NA	Yes	NA	NA	NA	NA	NA	Yes	NA	0.857143	Low
11456	Jedy-Agba 2017	Breast Cancer in sub-Saharan Africa : Determinants of Stage at Diagnosis and Diagnostic Delays in Women with Symptomatic Breast Cancer ELIMA JEDY-AGBA Thesis submitted in accordance with the requirements for the degree Doctor of Philosophy of the Universi	2017	Yes	Yes	Yes	Yes	No	Yes	Yes	No	No	No	Yes	Yes	No	NA	NA	0.615385	Medium
11708	Goedhart 2016	Delay in Diagnosis and Its Effect on Clinical Outcome in High-grade Sarcoma of Bone: A Referral Oncological Centre Study.	2016	Yes	No	Yes	Uncertain	No	No	No	No	NA	NA	NA	NA	NA	No	NA	0.222222	High
11714	Nandra 2015	One-year mortality in patients with bone and soft tissue sarcomas as an indicator of delay in presentation.	2015	Yes	Yes	Yes	Yes	No	No	No	NA	NA	NA	NA	NA	NA	Yes	NA	0.625	Medium
11730	Esmaelbeigi 2014	Factors affecting professional delay in diagnosis and treatment of oral cancer in Iran	2014	Yes	No	No	Uncertain	No	No	No	NA	No	No	No	Yes	No	NA	NA	0.166667	High
11754	Redaniel 2013	The association of waiting times from diagnosis to surgery with survival in women with localised breast cancer in England.	2013	Yes	Yes	No	Yes	No	NA	NA	No	NA	NA	NA	NA	NA	NA	Yes	0.571429	Medium
11756	Bertoli 2013	Time from diagnosis to intensive chemotherapy initiation does not adversely impact the outcome of patients with acute myeloid leukemia.	2013	Yes	Yes	Yes	Uncertain	No	NA	NA	Yes	NA	NA	NA	NA	NA	No	NA	0.571429	Medium
11757	Eastman 2013	Outcomes of delays in time to treatment in triple negative breast cancer.	2013	Yes	No	Yes	Uncertain	No	NA	NA	No	NA	NA	NA	NA	NA	No	NA	0.285714	Medium
11759	Lyhne 2013	Waiting times for diagnosis and treatment of head and neck cancer in Denmark in 2010 compared to 1992 and 2002.	2013	Yes	Yes	Yes	Yes	No	NA	No	No	NA	NA	NA	NA	NA	No	Yes	0.555556	Medium
11792	Valentín-López 2012	Assessment of a rapid referral pathway for suspected colorectal cancer in Madrid.	2012	Yes	Yes	Yes	Yes	No	NA	NA	No	NA	NA	NA	NA	NA	No	NA	0.571429	Medium
11797	Korets 2012	Effect of delaying surgery on radical prostatectomy outcomes: a contemporary analysis.	2012	Yes	Yes	No	Yes	No	NA	NA	No	NA	NA	NA	NA	NA	NA	No	0.428571	Medium
11802	Kämmerer 2012	Clinical, therapeutic and prognostic features of osteosarcoma of the jaws - experience of 36 cases.	2012	No	No	No	Uncertain	No	No	No	No	NA	NA	NA	NA	NA	No	NA	0	High
11844	Gort 2010	Actionable indicators for short and long term outcomes in rectal cancer.	2010	Yes	No	Yes	Uncertain	No	NA	NA	No	NA	NA	NA	NA	NA	No	Yes	0.375	Medium
11850	Waldert 2010	A delay in radical nephroureterectomy can lead to upstaging.	2009	No	No	No	No	No	NA	NA	No	NA	NA	NA	NA	NA	Uncertain	Uncertain	0	High
11852	Brazda 2010	Delays in time to treatment and survival impact in breast cancer.	2010	Yes	Yes	Yes	Uncertain	No	NA	NA	No	NA	NA	NA	NA	NA	No	NA	0.428571	Medium
11872	Tokuda 2009	Intervals between symptom onset and clinical presentation in cancer patients.	2009	Yes	Yes	Yes	Yes	No	Yes	No	NA	NA	NA	NA	NA	NA	Yes	Yes	0.777778	Low
11873	Smith 2009	Factors contributing to the time taken to consult with symptoms of lung cancer: a cross-sectional study.	2009	Yes	Yes	Yes	Yes	No	Yes	Yes	NA	No	Yes	No	No	Yes	No	NA	0.615385	Medium
11883	Richards 2016	Urinary tract infection-like symptom is associated with worse bladder cancer outcomes in the Medicare population: Implications for sex disparities	2016	Yes	Yes	No	Uncertain	No	NA	Uncertain	No	NA	NA	NA	NA	NA	NA	No	0.25	Medium
11952	Shamsi 2020	Patient Delay in Breast Cancer Diagnosis in Two Hospitals in Karachi, Pakistan: Preventive and Life-Saving Measures Needed.	2020	Yes	Yes	Yes	Yes	No	Yes	No	NA	No	Yes	Yes	Yes	Yes	NA	NA	0.75	Low
11961	Ganesan 2020	Diagnostic delay for head and neck cancer in South India: A Mixed-methods Study.	2020	Yes	Yes	Yes	Yes	Yes	Yes	No	No	No	No	No	Yes	No	NA	NA	0.538462	Medium
11963	Webber 2020	Breast cancer diagnosis and treatment wait times in specialized diagnostic units compared with usual care: a population-based study.	2020	Yes	Yes	No	Yes	No	NA	NA	No	NA	NA	NA	NA	NA	NA	Yes	0.571429	Medium
11966	Emerson 2020	Breast cancer treatment delays by socioeconomic and health care access latent classes in Black and White women.	2020	Yes	Yes	No	Yes	No	NA	NA	No	NA	NA	NA	NA	NA	No	NA	0.428571	Medium
11976	Rollig 2020	Does time from diagnosis to treatment affect the prognosis of patients with newly diagnosed acute myeloid leukemia?.	2020	Yes	Yes	Yes	Yes	No	NA	NA	No	NA	NA	NA	NA	NA	No	NA	0.571429	Medium
11977	Antel 2020	Diagnosing lymphoma in the shadow of an epidemic: lessons learned from the diagnostic challenges posed by the dual tuberculosis and HIV epidemics.	2020	Yes	Yes	Yes	Yes	No	Yes	No	No	NA	NA	NA	NA	NA	No	NA	0.555556	Medium
11996	Soomers 2020	The route to diagnosis of sarcoma patients: Results from an interview study in the Netherlands and the United Kingdom.	2020	Yes	Yes	Yes	Yes	Yes	Yes	No	No	No	No	Yes	Yes	Yes	No	NA	0.642857	Medium
12015	Kassirian 2020	Delay in diagnosis of patients with head-and-neck cancer in Canada: impact of patient and provider delay.	2020	Yes	Yes	Yes	Yes	No	Yes	No	No	Yes	Yes	Yes	Yes	No	NA	NA	0.692308	Medium
12031	Atkin 2021	Diagnostic pathways in multiple myeloma and their relationship to end organ damage: an analysis from the Tackling Early Morbidity and Mortality in Myeloma (TEAMM) trial.	2020	Yes	Yes	No	Yes	Yes	Yes	No	NA	No	Uncertain	Yes	Uncertain	No	NA	NA	0.5	Medium
12043	Padilla-Ruiz 2021	Factors that Influence Treatment Delay for Patients with Breast Cancer.	2021	Yes	Yes	No	Yes	No	NA	NA	No	NA	NA	NA	NA	NA	No	NA	0.428571	Medium
12052	Yoshida 2021	Importance of diagnosis-to-treatment interval in newly diagnosed patients with diffuse large B-cell lymphoma.	2021	Yes	No	No	Uncertain	No	NA	NA	No	NA	NA	NA	NA	NA	NA	No	0.142857	High
12058	Webber 2021	Factors associated with waiting time to breast cancer diagnosis among symptomatic breast cancer patients: a population-based study from Ontario, Canada.	2021	Yes	Yes	Yes	Yes	Yes	NA	Yes	No	NA	NA	NA	NA	NA	NA	Uncertain	0.75	Low
12080	Hewage 2021	Does the choice of care pathways matter in timely breast cancer care in Sri Lanka?.	2021	Yes	Yes	Yes	Yes	No	Yes	Yes	No	No	Yes	Yes	Uncertain	Yes	No	NA	0.642857	Medium
12091	Schoonbeek 2021	Determinants of delay in the head and neck oncology care pathway: The next step in value-based health care.	2021	Yes	Yes	Yes	Yes	No	NA	NA	Yes	NA	NA	NA	NA	NA	Yes	NA	0.857143	Low
12105	Norsa'adah 2021	Time Taken for Symptom Recognition, First Consultation, Diagnosis and First Definitive Treatment and Its Associated Factors among Women with Breast Cancer.	2022	Yes	No	Yes	Yes	Yes	Yes	No	No	No	No	Yes	Uncertain	Yes	No	NA	0.5	Medium
12124	Elias 2021	Treatment Delay in Melanoma: A Risk Factor Analysis of an Impending Crisis.	2021	Yes	Yes	Yes	Yes	No	NA	NA	No	NA	NA	NA	NA	NA	NA	Yes	0.714286	Medium
12127	Philip 2021	Patient Interval and Associated Factors in the Diagnostic Journey of Oral Cancer: A Hospital-Based Cross-Sectional Study from Kerala, India.	2021	Yes	Yes	No	Yes	Yes	Uncertain	No	NA	Yes	No	Yes	No	Yes	No	NA	0.538462	Medium
12140	NevesLima 2021	Sociodemographic and clinical factors associated with time to treatment for colorectal cancer in Brazil, 2006-2015	2021	Yes	Yes	No	Yes	Yes	NA	NA	No	NA	NA	NA	NA	NA	NA	No	0.571429	Medium
12152	Kiss 2021	Increase in the Length of Lung Cancer Patient Pathway Before First-Line Therapy: A 6-Year Nationwide Analysis From Hungary.	2021	Yes	Yes	Yes	Yes	No	NA	NA	No	NA	NA	NA	NA	NA	NA	Yes	0.714286	Medium
12162	Hussain 2021	Delays In Breast Cancer Diagnosis At A Tertiary Care Facility In Karachi, Pakistan.	2021	Yes	No	Yes	Yes	No	No	No	NA	No	Yes	Yes	Uncertain	Yes	No	NA	0.461538	Medium
12168	Mazza 2021	Do ethnic patients report longer lung cancer intervals than Anglo-Australian patients?: Findings from a prospective, observational cohort study.	2021	Yes	Yes	Yes	Yes	Yes	No	No	NA	Yes	No	Yes	Yes	Yes	Yes	NA	0.769231	Low
12178	Cubiella 2021	Impact of a colorectal cancer screening program implantation on delays and prognosis of non-screening detected colorectal cancer.	2021	Yes	Yes	Yes	Yes	No	NA	No	No	NA	NA	NA	NA	NA	No	Uncertain	0.444444	Medium
12183	Blunt 2021	Shorter Diagnosis-to-Treatment Interval in Diffuse Large B-Cell Lymphoma is Associated With Inferior Overall Survival in a Large, Population-Based Registry.	2021	Yes	Yes	Uncertain	Yes	No	NA	NA	No	NA	NA	NA	NA	NA	NA	Yes	0.571429	Medium
12193	Heiden 2021	Analysis of Delayed Surgical Treatment and Oncologic Outcomes in Clinical Stage I Non-Small Cell Lung Cancer.	2021	Yes	Yes	No	Yes	No	NA	NA	Yes	NA	NA	NA	NA	NA	NA	No	0.571429	Medium
12196	Murchie 2021	Geographic variation in diagnostic and treatment interval, cancer stage and mortality among colorectal patients - An international comparison between Denmark and Scotland using data-linked cohorts.	2021	Yes	Yes	Yes	Yes	No	NA	NA	No	Uncertain	No	No	No	Uncertain	No	No	0.307692	Medium
12204	Majeed 2021	Diagnostic and treatment delays in breast cancer in association with multiple factors in Pakistan.	2021	Yes	Yes	Uncertain	Yes	No	NA	No	No	NA	NA	NA	NA	NA	No	NA	0.375	Medium
12211	Alig 2021	Short Diagnosis-to-Treatment Interval Is Associated With Higher Circulating Tumor DNA Levels in Diffuse Large B-Cell Lymphoma.	2021	Yes	Yes	No	Yes	No	NA	NA	No	NA	NA	NA	NA	NA	No	NA	0.428571	Medium
12217	Kumar 2021	Treatment Seeking Behavior, Treatment Cost and Quality of Life of Head and Neck Cancer Patients: A Cross-Sectional Analytical Study from South India.	2021	Yes	Yes	Yes	Yes	No	Yes	No	No	No	No	Yes	Yes	Yes	No	NA	0.571429	Medium
12223	Mujar 2022	Breast Cancer Care Timeliness Framework: A Quality Framework for Cancer Control.	2022	Yes	Yes	Yes	Yes	Yes	No	No	No	No	Yes	No	No	Yes	No	NA	0.5	Medium
12225	CanaverasLeon 2022	[Delay in the diagnosis and treatment of five types of cancer in two urban health centres].	2021	Yes	No	No	Yes	Yes	No	No	No	NA	NA	NA	NA	NA	Uncertain	NA	0.333333	Medium
12226	Rai 2022	Study of Diagnostic Delay among Symptomatic Breast Cancer Patients in Northern India: A Mixed-Methods Analysis from a Dedicated Breast Cancer Centre.	2022	Yes	Yes	No	Yes	Yes	No	No	No	No	No	No	No	No	NA	NA	0.307692	Medium
12232	Matarredona-Quiles 2022	Factors associated with diagnosis delay in head and neck cancer.	2022	Yes	Yes	No	Yes	No	Yes	No	No	NA	NA	NA	NA	NA	No	NA	0.444444	Medium
12251	Badri 2022	Retrospective study of factors associated with late detection of oral cancer in alberta: A qualitative study.	2022	Yes	Yes	Yes	Yes	Yes	No	No	No	NA	NA	NA	NA	NA	Yes	Uncertain	0.6	Medium
12259	Virgilsen 2022	Diagnosing pancreatic cancer in general practice: a cross-sectional study on associations between suspicion of cancer, urgent referral and time to diagnosis.	2022	Yes	Yes	Yes	Yes	Yes	NA	Yes	No	No	Yes	Yes	Yes	NA	NA	No	0.75	Low
12269	Shahid 2022	A study of the effects of delayed patient presentation on cutaneous SCC progression.	2022	Yes	No	No	Yes	No	No	No	NA	NA	NA	NA	NA	NA	Yes	NA	0.375	Medium
12288	Babatunde 2022	Racial Disparities and Diagnosis-to-Treatment Time Among Patients Diagnosed with Breast Cancer in South Carolina.	2021	Yes	Yes	No	Yes	No	NA	NA	No	NA	NA	NA	NA	NA	NA	No	0.428571	Medium
12302	Kouka 2022	No impact of time to treatment initiation for head and neck cancer in a tertiary university center in 2003, 2008 and 2013	2022	Yes	Yes	No	Yes	No	NA	NA	No	NA	NA	NA	NA	NA	NA	No	0.428571	Medium
12319	Tsutsumi 2022	Impact of esthesioneuroblastoma treatment delays on overall patient survival	2022	Yes	Yes	No	Yes	No	NA	NA	No	NA	NA	NA	NA	NA	NA	Yes	0.571429	Medium
12323	Blackmore 2021	Patient-reported diagnostic intervals to colorectal cancer diagnosis in the Midland region of New Zealand: a prospective cohort study	2021	Yes	Yes	Yes	Yes	Yes	Yes	Yes	Yes	Yes	Yes	Yes	Yes	Uncertain	No	NA	0.857143	Low
12337	Beaudoin 2022	Identifying Barriers in Access to Care for Head and Neck Cancer Patients: A Field Study in Dakar	2021	Yes	Yes	Yes	Yes	Yes	No	No	NA	No	No	Yes	No	No	NA	NA	0.5	Medium
12346	Linxweiler 2022	Cytology-based Cancer Surgery of the Head and Neck (CyCaS-HN): a prospective, randomized, controlled clinical trial	2022	Yes	Yes	Uncertain	Yes	No	NA	NA	No	NA	NA	NA	NA	NA	No	NA	0.428571	Medium
12364	Andkhoie 2020	Geographic factors associated with time-to-treatment outcomes for radiation therapy among localized prostate cancer patients in Saskatchewan	2020	Yes	Yes	Yes	Yes	No	NA	NA	No	NA	NA	NA	NA	NA	NA	No	0.571429	Medium
12371	Mansour 2020	Breast Cancer: Delays of Access to Diagnosis and Treatment Retrospective Study-Batna, Algeria August 2015-February 2016	2020	Yes	Yes	Yes	Yes	Uncertain	Yes	No	No	No	No	Yes	No	No	NA	NA	0.461538	Medium
12404	Tesfaw 2020	Patient Delay and Contributing Factors Among Breast Cancer Patients at Two Cancer Referral Centres in Ethiopia: A Cross-Sectional Study	2020	Yes	Yes	Yes	Yes	No	Yes	No	NA	No	Yes	Uncertain	No	No	NA	NA	0.5	Medium
12416	Zumer 2020	Impact of delays in radiotherapy of head and neck cancer on outcome	2020	Yes	Yes	No	Yes	No	NA	NA	No	NA	NA	NA	NA	NA	No	NA	0.428571	Medium
12427	Almubarak 2020	Secondary Care Delay in Diagnosis and Treatment of Oral Cancer at Asir Central Hospital, Saudi Arabia: A Case Series Study	2020	Uncertain	Uncertain	No	Yes	No	NA	NA	No	NA	NA	NA	NA	NA	No	NA	0.142857	High
12440	Nassali 2021	Timelines to Cervical Cancer Diagnosis and Treatment at a Tertiary Hospital in Botswana	2021	Yes	Yes	Yes	Yes	No	Yes	No	No	NA	NA	NA	NA	NA	Yes	NA	0.666667	Medium
12442	Sifontes-Dubon 2021	Evaluation of a Clinical Pathway for Thyroid Nodular Disease: Timings and Delays in the Diagnosis and Treatment of Thyroid Cancer	2021	Yes	Yes	Yes	Yes	No	NA	NA	No	NA	NA	NA	NA	NA	Yes	NA	0.714286	Medium
12502	Hayes 2021	Age-related and socioeconomic inequalities in timeliness of referral and start of treatment in colorectal cancer: a population-based analysis	2021	Yes	Uncertain	Yes	Yes	No	NA	NA	No	NA	NA	NA	NA	NA	NA	Yes	0.571429	Medium
12516	Olaogun 2021	Management of Locally Advanced Breast Cancer: Challenges and Treatment Outcomes in an Emerging Tertiary Hospital in South-western Nigeria	2021	Yes	Yes	Yes	Yes	No	No	No	No	NA	NA	NA	NA	NA	No	NA	0.444444	Medium
12530	Han 2021	Is time-to-treatment associated with higher mortality in Korean elderly lung cancer patients?	2021	Yes	Yes	Yes	Uncertain	No	NA	NA	No	NA	NA	NA	NA	NA	NA	Yes	0.571429	Medium
12600	Jensen 2021	Impact of time to treatment initiation for patients with oral cavity squamous cell carcinoma: a population-based, retrospective study	2021	Yes	Yes	No	Yes	No	NA	NA	No	NA	NA	NA	NA	NA	NA	Uncertain	0.428571	Medium
12616	Ksienski 2021	Time to Treatment With Nivolumab or Pembrolizumab for Patients With Advanced Melanoma in Everyday Practice	2021	Yes	Yes	No	Yes	No	NA	NA	No	NA	NA	NA	NA	NA	NA	No	0.428571	Medium
12618	dosSantosAndrade 2021	Shorter delay to treatment by integrated diagnostic services and NGO-provided support among breast cancer patients in two Brazilian referral centres	2021	Yes	Yes	Yes	Yes	No	NA	NA	No	No	No	Yes	Yes	Uncertain	Yes	NA	0.583333	Medium
12639	Goenka 2021	The ``collateral damage{''} of the war on COVID-19: impact of the pandemic on the care of epithelial ovarian cancer	2021	Yes	No	No	Yes	No	NA	NA	No	NA	NA	NA	NA	NA	No	NA	0.285714	Medium
12648	Greer 2021	The impact of fertility preservation on the timing of breast cancer treatment, recurrence, and survival	2021	Yes	Yes	No	Yes	No	NA	NA	No	NA	NA	NA	NA	NA	Yes	NA	0.571429	Medium
12691	Hassen 2021	Factors Associated with Delay in Breast Cancer Presentation at the Only Oncology Center in North East Ethiopia: A Cross-Sectional Study	2021	Yes	Yes	Yes	Yes	Yes	Yes	No	NA	No	Yes	Uncertain	Yes	Uncertain	NA	NA	0.666667	Medium
12692	Mumba 2021	Cervical cancer diagnosis and treatment delays in the developing world: Evidence from a hospital-based study in Zambia	2021	Yes	Yes	Yes	Yes	No	NA	NA	No	NA	NA	NA	NA	NA	Uncertain	NA	0.571429	Medium
12696	Sathoo 2021	A qualitative exploratory study of delay in the presentation of gastrointestinal cancer	2021	Yes	Yes	No	Yes	Yes	NA	No	No	No	No	Yes	No	Yes	NA	NA	0.5	Medium
12703	IgnacioVarela-Centelles 2021	Impact of the Presenting Symptom on Time Intervals and Diagnostic Routes of Patients with Symptomatic Oral Cancer	2021	Yes	No	No	Yes	Yes	Yes	No	No	No	Yes	Yes	No	Yes	No	NA	0.5	Medium
12728	Karp 2021	Barriers to Obtaining a Timely Diagnosis in Human Papillomavirus-Associated Oropharynx Cancer	2021	Yes	Yes	No	Yes	No	Yes	No	No	NA	NA	NA	NA	NA	No	NA	0.444444	Medium
12733	Li 2021	Enhancing social support and knowledge perception decreases patient delay in breast cancer	2021	Yes	Yes	No	Yes	No	Uncertain	No	NA	No	No	Yes	Yes	No	NA	NA	0.416667	Medium
12788	Urban 2022	The Prognostic Impact of Radiotherapy Delays in Oropharynx Carcinoma and the Role of p16 Status	2022	Yes	Yes	No	Yes	No	NA	NA	No	NA	NA	NA	NA	NA	No	NA	0.428571	Medium
12789	Marcickiewicz 2022	The wait time to primary surgery in endometrial cancer - impact on survival and predictive factors: a population-based SweGCG study	2022	Yes	Yes	Yes	Yes	No	NA	NA	No	NA	NA	NA	NA	NA	NA	Yes	0.714286	Medium
12817	Lee 2022	Association between Delay to Radical Prostatectomy and Clinically Meaningful Outcomes among Patients with Intermediate and High-Risk Localized Prostate Cancer	2022	Yes	Yes	Yes	Yes	No	NA	NA	No	NA	NA	NA	NA	NA	NA	Yes	0.714286	Medium
12821	Pumpalova 2022	The Impact of Breast Cancer Treatment Delays on Survival Among South African Women	2022	Yes	Yes	Uncertain	Yes	No	NA	NA	No	NA	NA	NA	NA	NA	No	NA	0.428571	Medium
12877	Martínez-Pérez 2020	Association between delayed diagnosis and breast cancer in advanced clinical stage at the time of consultation in four oncology centers in Medellin-Colombia, 2017. Cross-sectional study	2020	Yes	Yes	No	Yes	No	Yes	Uncertain	No	Yes	Yes	Yes	Yes	No	NA	NA	0.615385	Medium
13467	HernándezVargas 2021	Factors associated with delays in time to treatment initiation in Colombian women with cervical cancer: A cross-sectional analysis	2021	Yes	Yes	Yes	Yes	No	NA	NA	Yes	NA	NA	NA	NA	NA	NA	Yes	0.857143	Low
13515	Kotecha 2021	Evaluating the delay prior to primary care presentation in patients with lung cancer: a cohort study	2021	Yes	Yes	No	Yes	Yes	Yes	Yes	NA	No	No	Yes	Yes	Yes	Yes	NA	0.769231	Low
13544	Naidoo 2021	Delays in the referral and primary management of cutaneous malignant melanoma at Tygerberg Hospital	2021	Yes	Yes	No	Yes	No	NA	NA	No	NA	NA	NA	NA	NA	Uncertain	NA	0.428571	Medium
13716	Ferro 2021	The impact of sars-cov-2 pandemic on time to primary, secondary resection and adjuvant intravesical therapy in patients with high-risk non-muscle invasive bladder cancer: A retrospective multi-institutional cohort analysis	2021	Yes	No	No	Yes	No	NA	NA	No	NA	NA	NA	NA	NA	No	NA	0.285714	Medium
13810	Filho 2021	Cultural, social, and healthcare access factors associated with delays in gastric cancer presentation, diagnosis, and treatment: A cross-sectional study	2021	Yes	No	Yes	Yes	No	No	No	No	No	No	Uncertain	Yes	No	NA	NA	0.307692	Medium
14112	Mimouni 2022	The patient, diagnosis and treatment delay of the care pathway of patients with breast Cancer in Morocco	2022	No	No	No	Yes	Uncertain	No	No	No	NA	NA	NA	NA	NA	No	NA	0.111111	High
14172	Karnchanachari 2022	The SYMPTOM-upper gastrointestinal study: A mixed methods study exploring symptom appraisal and help-seeking in Australian upper gastrointestinal cancer patients	2022	Yes	Yes	No	Yes	Yes	Yes	No	No	Yes	No	Yes	Yes	Yes	NA	NA	0.692308	Medium
14176	Benider 2022	Evolution of patterns of care for women with cervical cancer in Morocco over a decade	2022	Yes	Yes	Yes	Yes	Yes	No	No	No	NA	NA	NA	NA	NA	Yes	NA	0.666667	Medium
14181	Huerta-Gutierrez 2021	No Title	2021	Yes	No	Yes	Yes	No	No	No	No	No	Yes	No	No	Yes	No	NA	0.357143	Medium
14189	vanErp 2020b	Exploring the diagnostic pathway of symptomatic cancer patients in the Netherlands	2020	Yes	Yes	Yes	Yes	Yes	Yes	Yes	Yes	NA	NA	NA	NA	NA	Yes	Yes	1	Low
				395	297	280	273	76	99	64	43	19	48	92	82	46	68	100	High	53	0.129268
				0.963415	0.72439	0.682927	0.665854	0.185366	0.55618	0.280702	0.131498	0.126667	0.32	0.613333	0.543046	0.310811	0.300885	0.714286	Medium	290	0.707317
																			Low	67	0.163415
