# Supplementary material for: The patient, diagnostic, and treatment intervals in adult patients with cancer from high- and lower-income countries: A systematic review and meta-analysis
Source: PLoS Med. 2022 Oct 20;19(10):e1004110. doi: 10.1371/journal.pmed.1004110 (PMC9584443; doi:10.1371/journal.pmed.1004110)
Supplement: S11 Table — Note: k = number of studies/estimates; N = number of patients; med = pooled median; LLCI and ULCI = lower level and upper level confidence interval, respectively; Difference = the pooled median when studies with high risk are excluded minus the pooled median when all studies are included. (XLSX) [file pmed.1004110.s011.xlsx]

## Sheet: Hoja1
Table S11. Pooled median duration of the patient, diagnostic, and treatment interval excluding studies with high risk of bias according to the Aarhus checklist score. k=number of studies/estimates; N=number of patients; med=pooled median; LLCI and ULCI=lower level and upper level confidence interval, respectively; Difference=the pooled median when studies with high risk are excluded minus the poo…
	Patient interval					Diagnostic interval					Pre-treatment interval
Type of cancer	k	N	med	LLCI	ULCI	k	N	med	LLCI	ULCI	k	N	med	LLCI	ULCI
Breast	82	23,530	40	33	51	49	94,168	25	20	28	90	1,687,356	29	26	31
Digestive/gastrointestinal	45	11,856	28	21	30	65	71,975	59	46	71	95	1,122,602	24	20	31
Colorectal	24	8,703	29	22	32	41	63,673	64	49	78	59	999,583	18	14	22
Genitourinary	30	6,397	18	10	30	35	43,330	57	48	72	42	1,368,398	57	44	65
Gynecological	30	4,130	26	15	39	21	4,086	48	40	76	29	136,143	46	38	53
Head and neck	44	5,315	46	31	63	29	4,364	35	26	50	67	126,236	33	31	37
Hematological	34	5,134	20	16	28	37	9,990	71	51	86	13	18,259	12	6	25
Sarcoma	9	4,016	45	25	141	4	224	105	66	126	10	13,329	21	21	22
Neurologic/brain	3	255	15	7	730	3	300	28	6	29	0	0	-	-	-
Lung	30	7,100	23	21	31	22	19,348	47	35	54	54	547,506	32	28	42
Melanoma	7	1,235	70	25	217	11	1,938	29	18	35	6	104,685	32	20	73
