# Supplementary material for: The patient, diagnostic, and treatment intervals in adult patients with cancer from high- and lower-income countries: A systematic review and meta-analysis
Source: PLoS Med. 2022 Oct 20;19(10):e1004110. doi: 10.1371/journal.pmed.1004110 (PMC9584443; doi:10.1371/journal.pmed.1004110)
Supplement: S12 Table — Note: k = number of studies/estimates; N = number of patients; med = pooled median; LLCI and ULCI = lower level and upper level confidence interval, respectively; Difference = the pooled median when studies reporting the median minus the pooled median when studies reporting the median or mean are included. (XLSX) [file pmed.1004110.s012.xlsx]

## Sheet: Hoja1
Table S12. Pooled median duration of the patient, diagnostic, and treatment interval excluding studies that only reported means. k=number of studies/estimates; N=number of patients; med=pooled median; LLCI and ULCI=lower level and upper level confidence interval, respectively; Difference=the pooled median when studies reporting the median minus the pooled median when studies reporting the median …
	Patient interval					Diagnostic interval					Pre-treatment interval
Type of cancer	k	N	med	LLCI	ULCI	k	N	med	LLCI	ULCI	k	N	med	LLCI	ULCI
Breast	68	18,054	40	30	56	55	94,603	24	21	28	80	1,681,963	28	25	30
Digestive/gastrointestinal	45	12,083	28	21	30	63	70,948	54	44	65	98	1,125,597	23	19	31
Colorectal	24	8,930	29	22	32	39	62,680	60	44	74	61	1,002,281	17	14	22
Genitourinary	28	6,379	14	8	30	35	31,912	57	48	79	46	1,369,403	55	44	65
Gynecological	32	4,218	27	16	51	21	4,086	48	40	76	29	22.753	46	33	55
Head and neck	44	4,701	39	31	60	26	3,449	34	26	42	58	124,556	32	30	34
Hematological	38	5,346	21	16	29	40	10,178	71	52	85	15	18,446	15	7	26
Sarcoma	10	4,039	60	27	114	4	224	105	66	126	11	13,352	21	21	22
Neurologic/brain	5	320	48	9	616	3	300	28	6	29	2	65	26	25	26
Lung	32	16,790	27	21	30	24	31,698	44	35	54	46	510,796	29	23	32
Melanoma	7	1,055	70	25	170	11	1,938	29	18	35	8	105,239	32	27	51
